# Supplementary material for: The Unexpected Chemistry of Thiacalix[4]arene Monosulfoxide
Source: MDPI journal article supplement (doi:10.3390/molecules28093914), 2023-05-05
Supplement: s1 [file s1]

# Supporting Information

## Unexpected Chemistry of Thiacalix[4]arene Monosulfoxide

Kamil Mamleev<sup>1</sup>, Václav Eigner<sup>2</sup>, Hana Dvořáková<sup>3</sup> and Pavel Lhoták<sup>1,\*</sup>

### Table of Contents

|                                                        |    |
|--------------------------------------------------------|----|
| 1. Spectral characterization of compounds.....         | 2  |
| 2. The Variable Temperature (VT) NMR experiments ..... | 11 |
| 3. Crystallographic data .....                         | 19 |

# 1. Spectral characterization of compounds

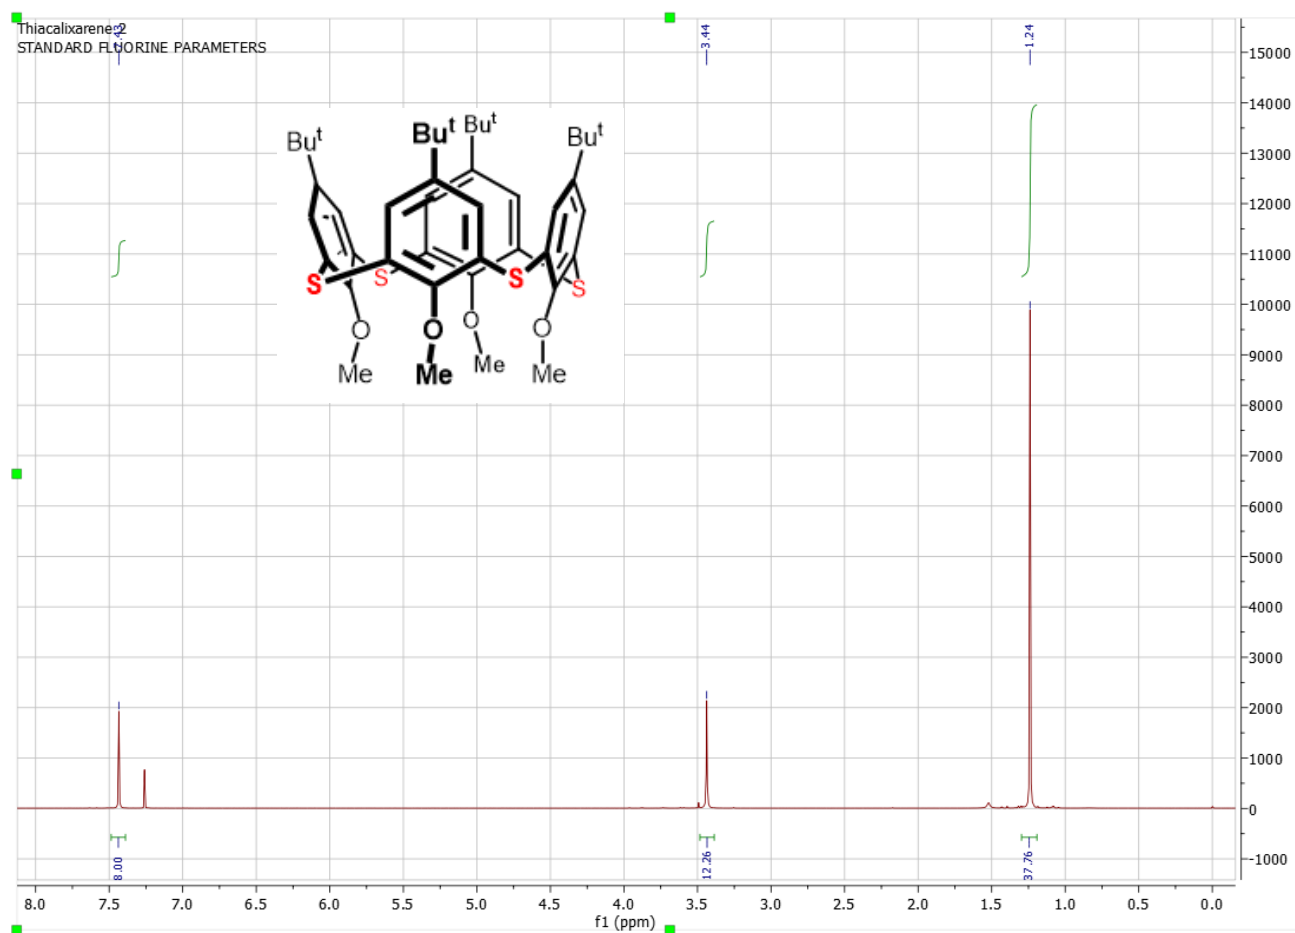

**Figure S1:** <sup>1</sup>H NMR of compound tetramethoxy derivative **2** (CDCl<sub>3</sub>, 400 MHz).

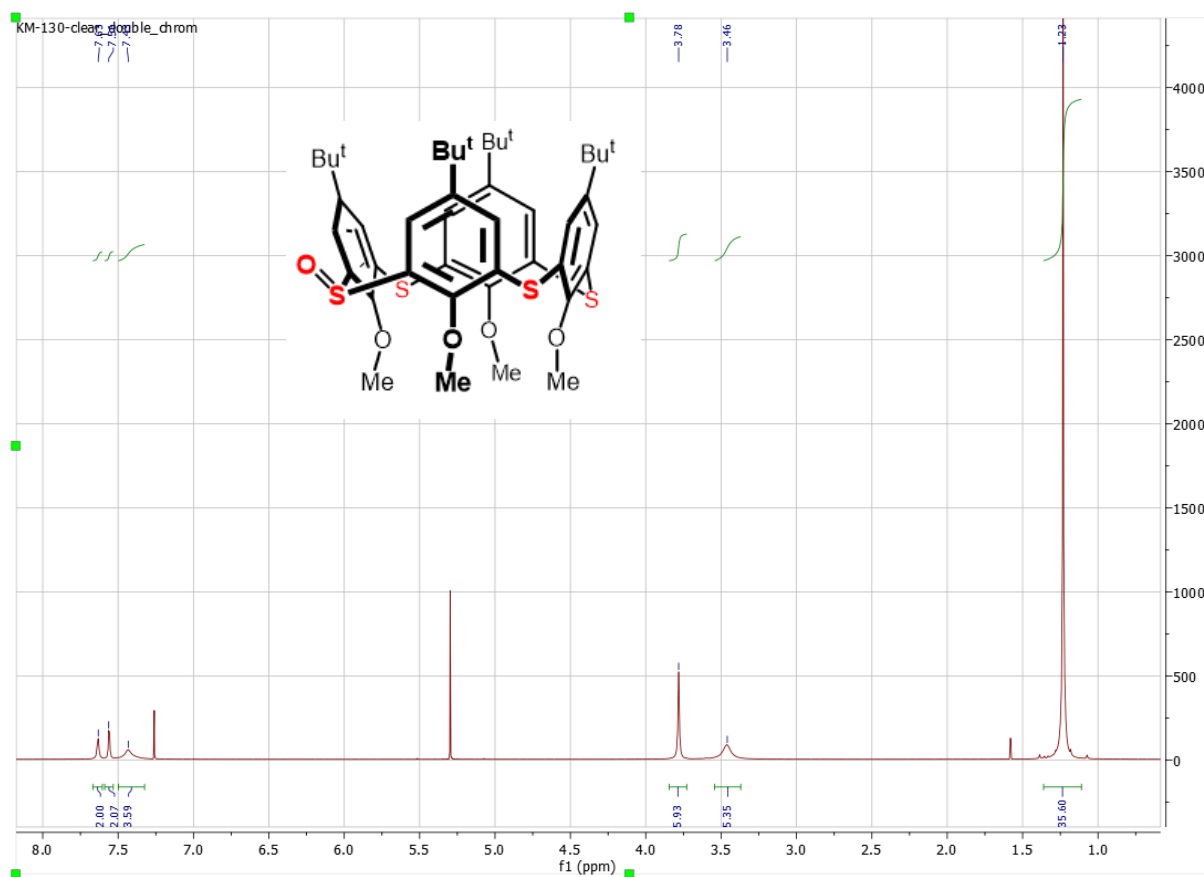

**Figure S2:** <sup>1</sup>H NMR of compound 3 (CDCl<sub>3</sub>, 400 MHz).

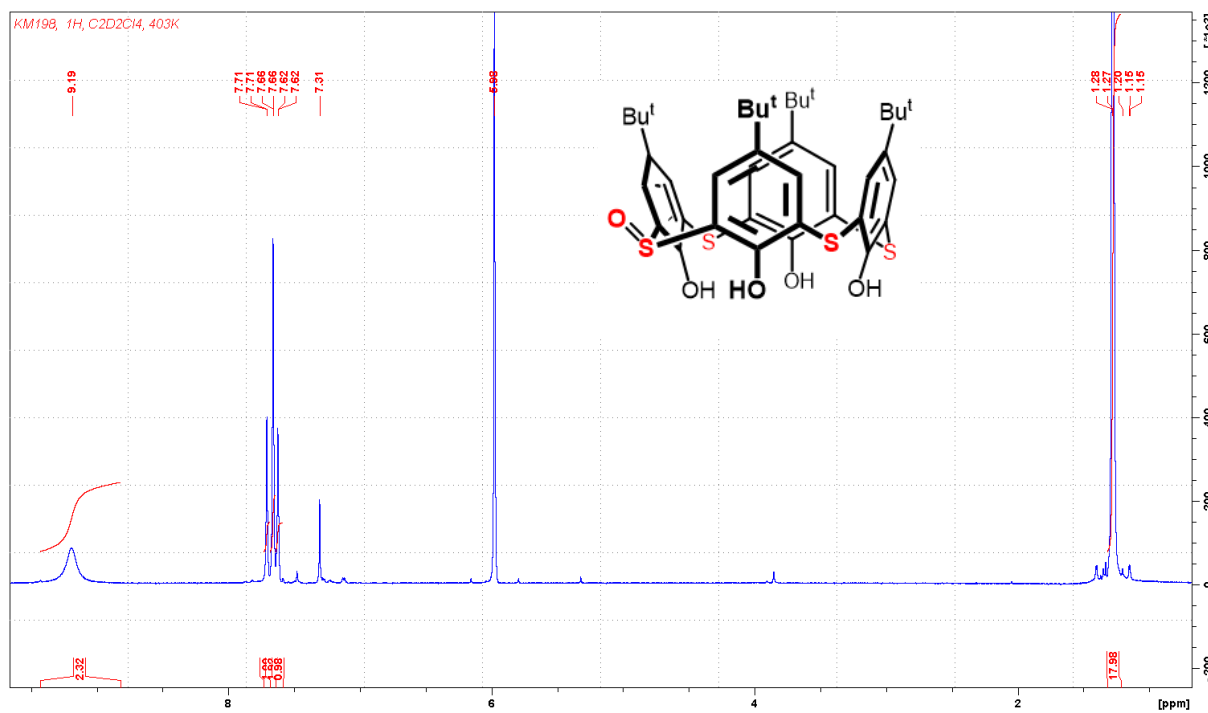

**Figure S3:** <sup>1</sup>H NMR of compound 4 (C<sub>2</sub>D<sub>2</sub>Cl<sub>4</sub>, 500 MHz, 403 °K).

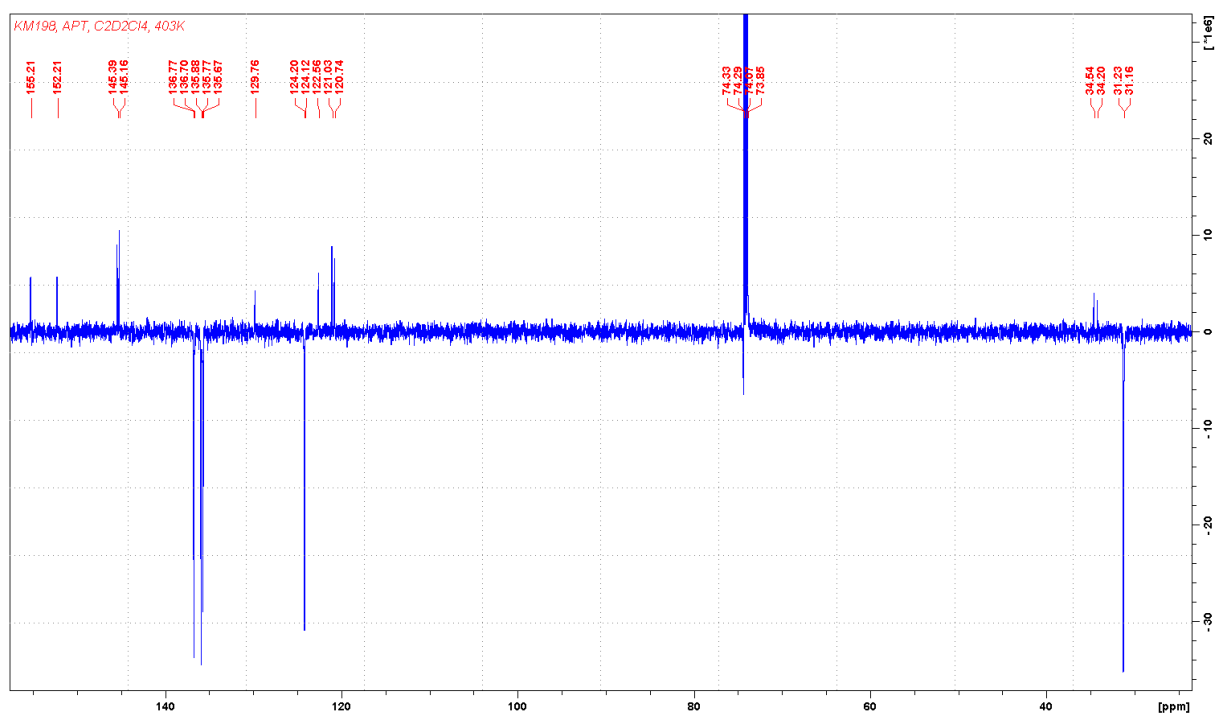

**Figure S4:**  $^{13}\text{C}$ (APT) NMR of compound 4 ( $\text{C}_2\text{D}_2\text{Cl}_4$ , 100 MHz, 403 °K)

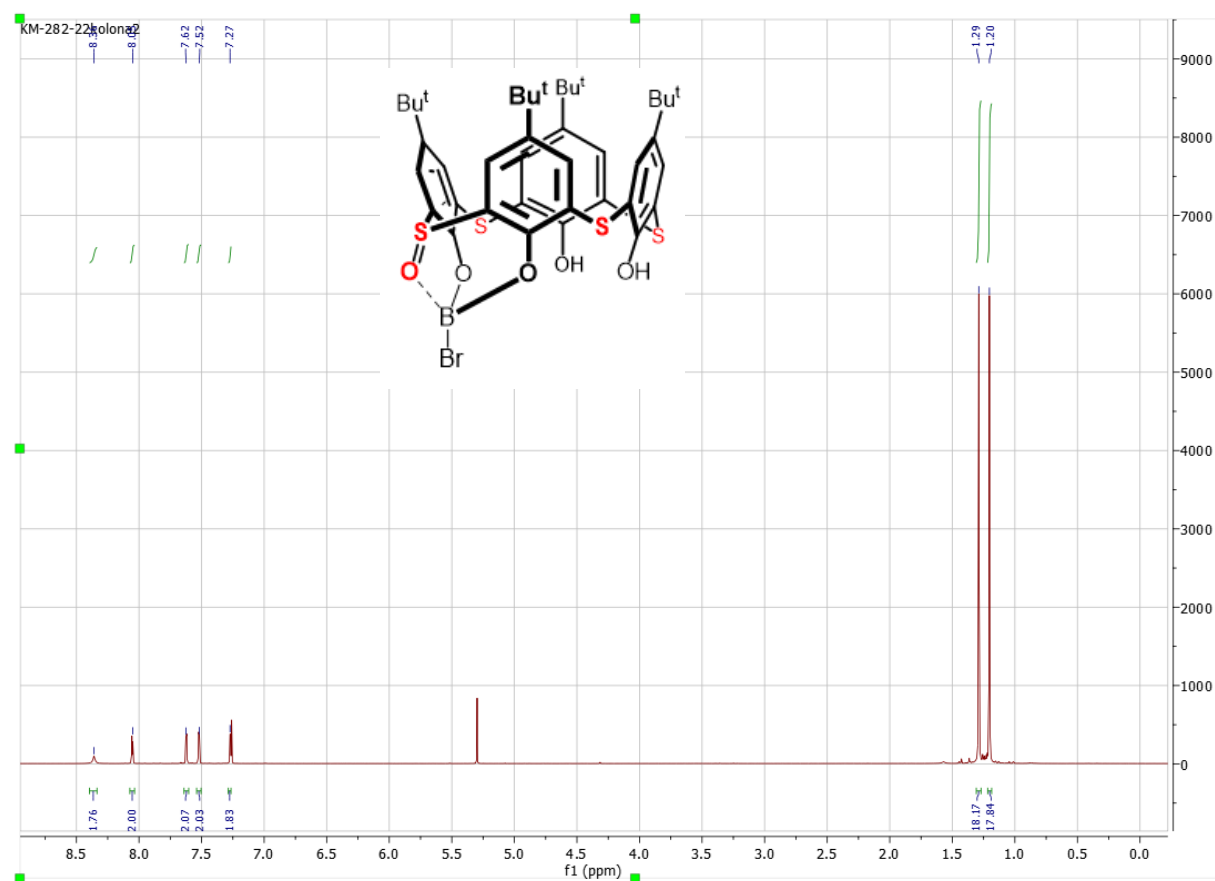

**Figure S5:**  $^1\text{H}$  NMR of compound 5 ( $\text{CDCl}_3$ , 400 MHz).

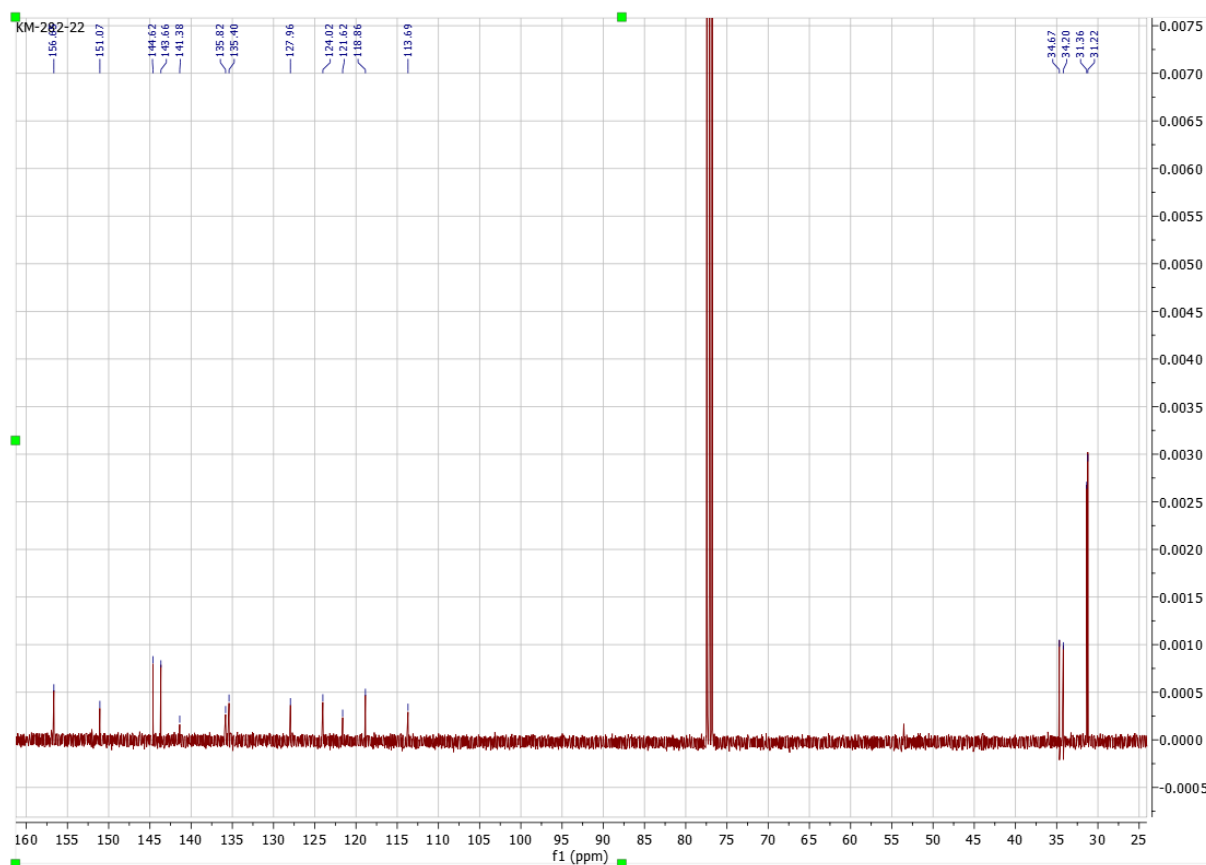

**Figure S6:**  $^{13}\text{C}$  NMR of compound **5** ( $\text{CDCl}_3$ , 100 MHz)

335\_Mamleev\_ESIpos\_KM-259-C\_1  
MetOH

9/9/2022 12:35:13 PM

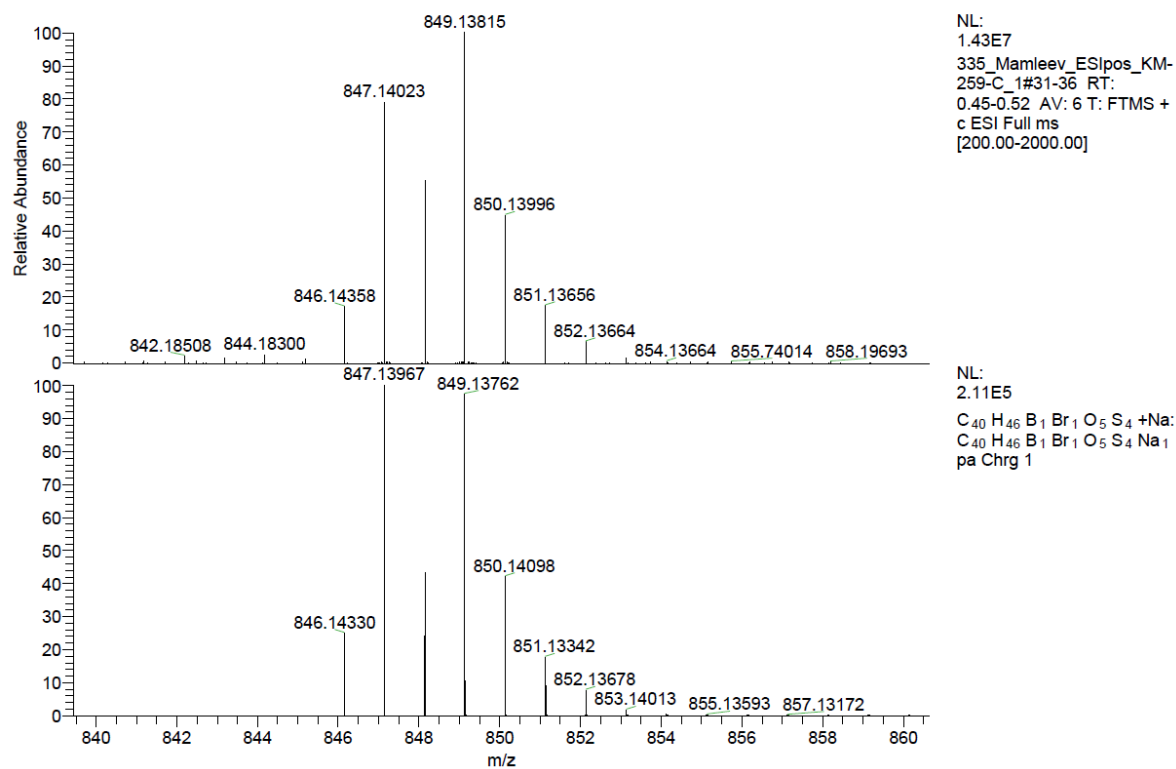

**Figure S7:** HRMS of compound **5** ( $\text{ESI}^+$ ).

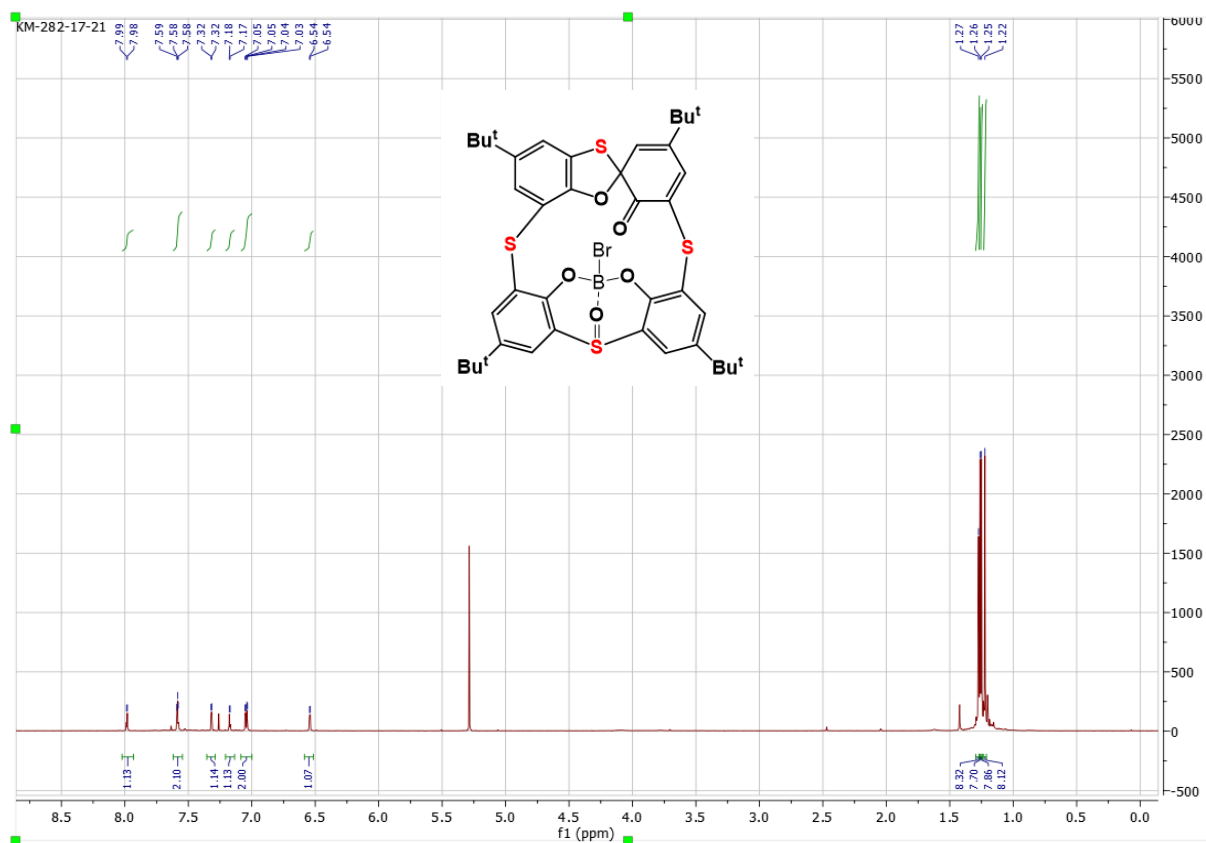

Figure S8: <sup>1</sup>H NMR of compound 6 (CDCl<sub>3</sub>, 400 MHz).

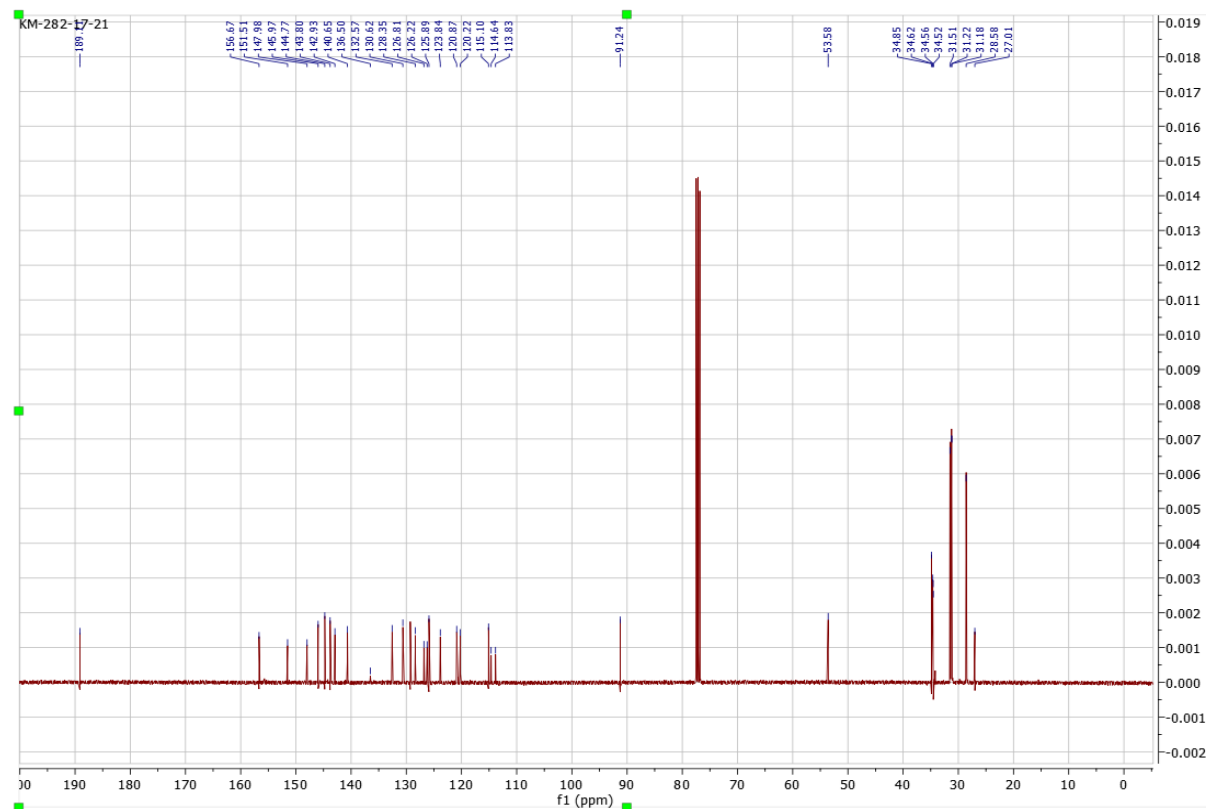

Figure S9: <sup>13</sup>C NMR of compound 6 (CDCl<sub>3</sub>, 100 MHz)

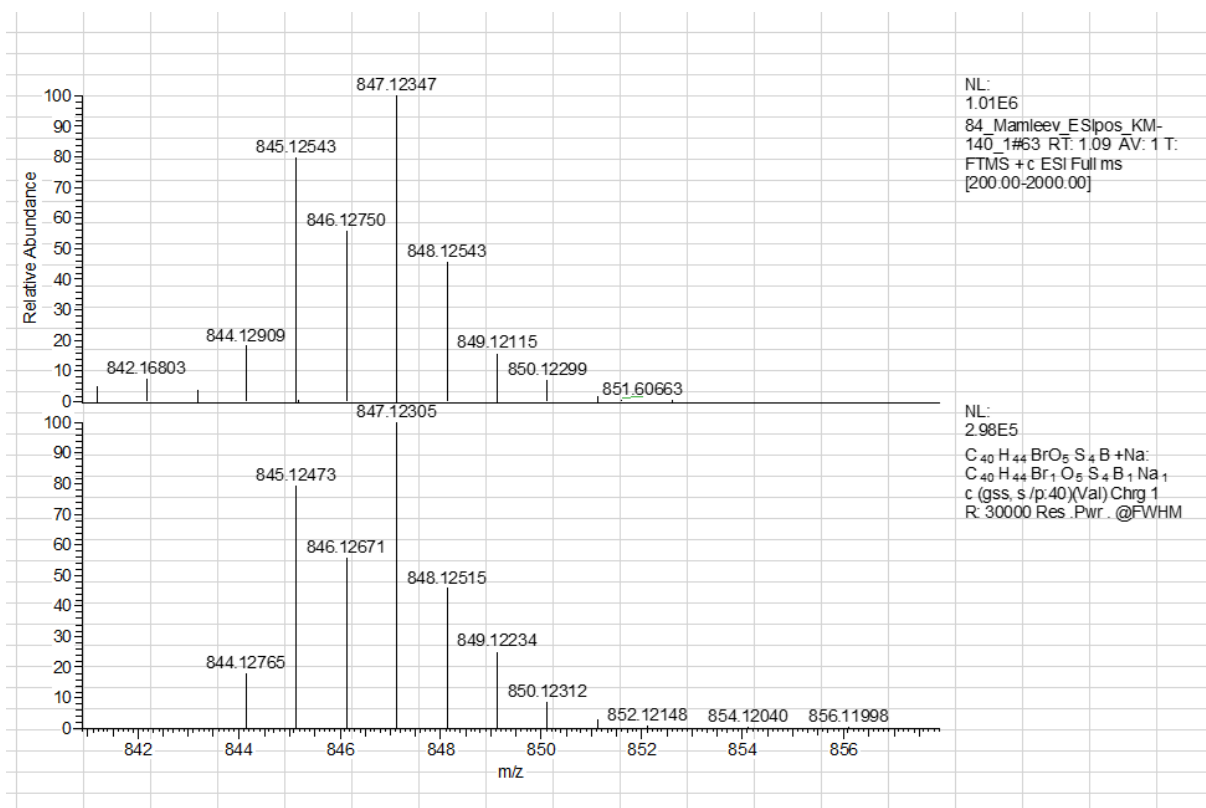

Figure S10: HRMS of compound 6 (ESI<sup>+</sup>).

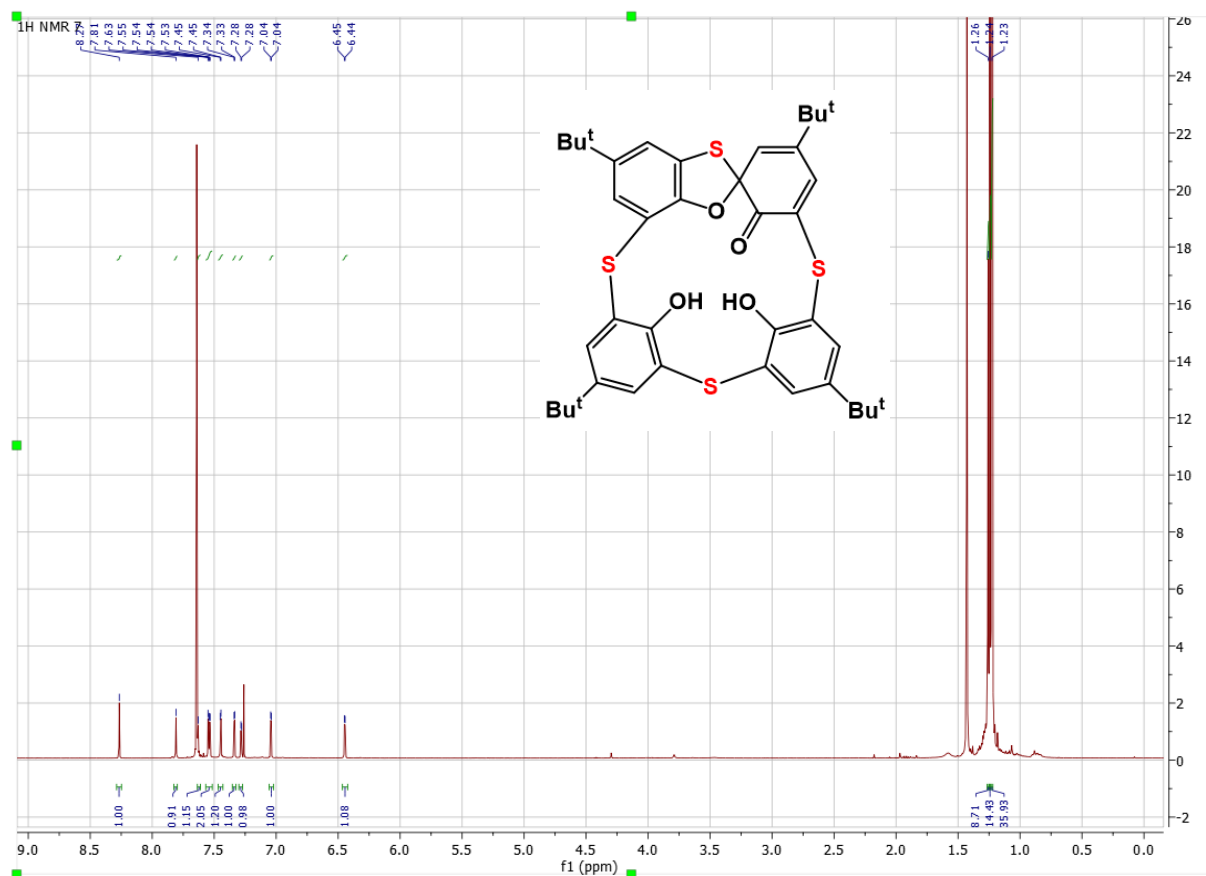

Figure S11: <sup>1</sup>H NMR of compound 7 (CDCl<sub>3</sub>, 400 MHz).

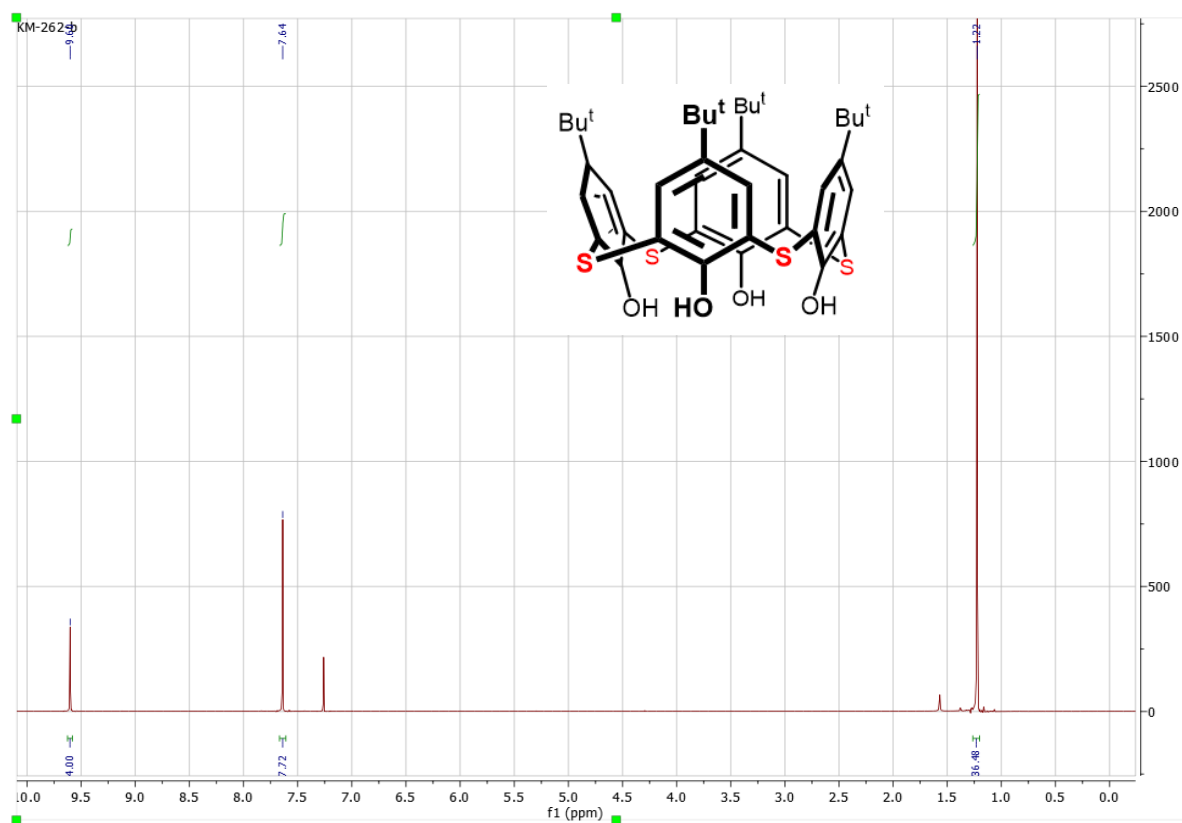

**Figure S12:**  $^1\text{H}$  NMR of compound **1** ( $\text{CDCl}_3$ , 400 MHz).

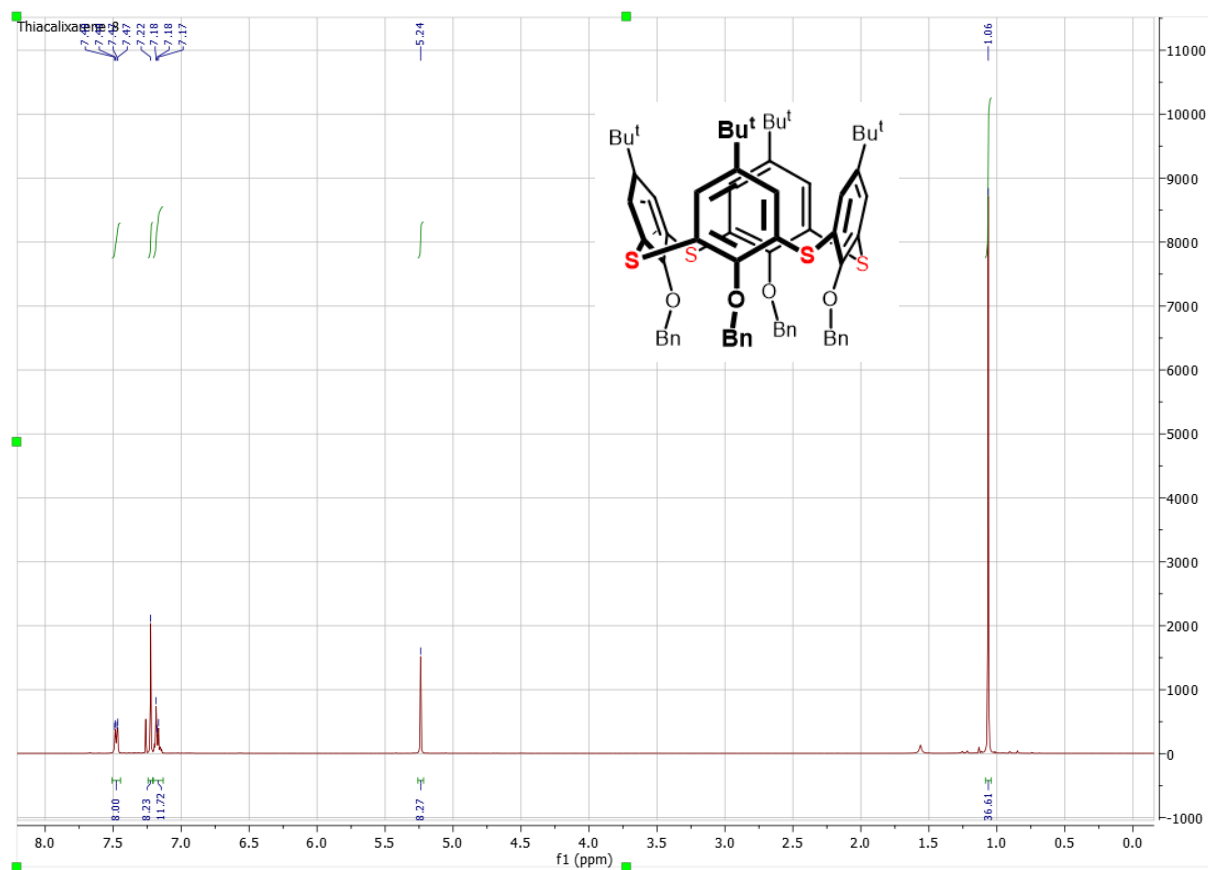

**Figure S13:**  $^1\text{H}$  NMR of compound **8** ( $\text{CDCl}_3$ , 400 MHz).



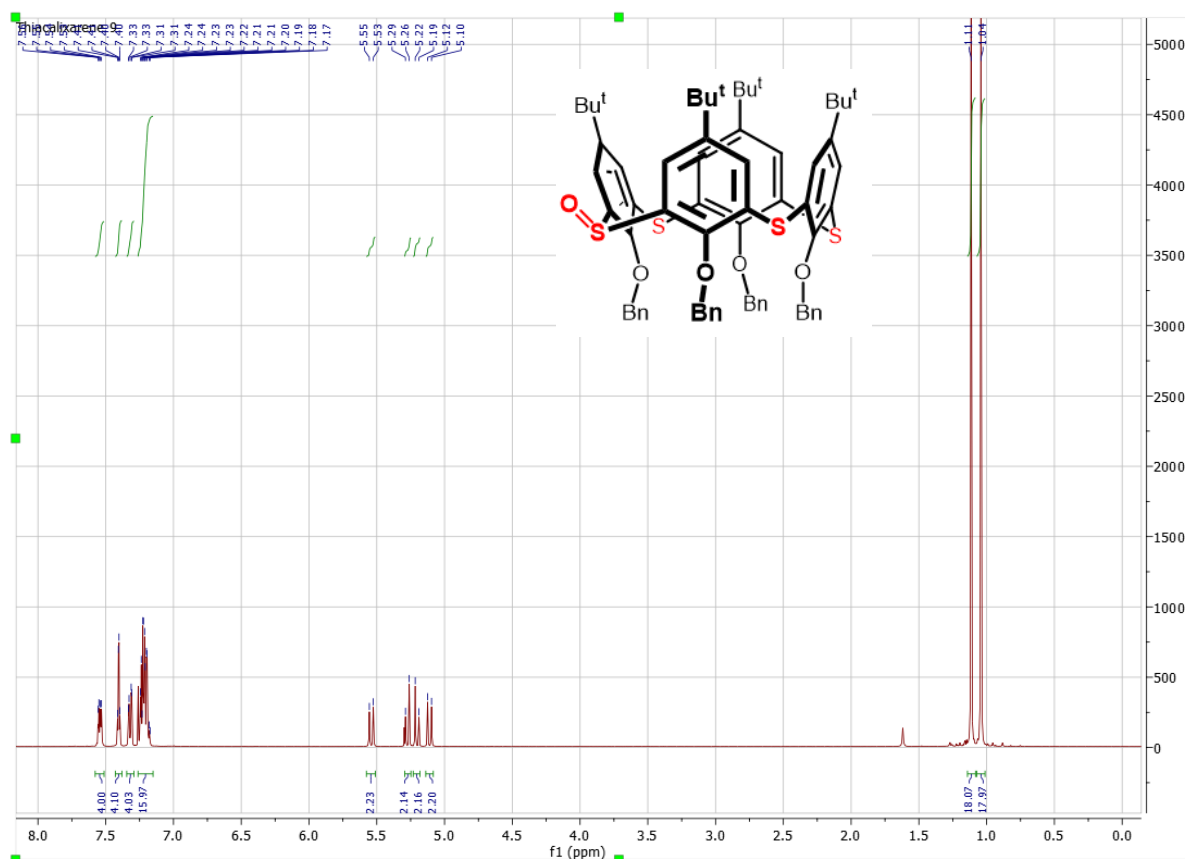

**Figure S14:** <sup>1</sup>H NMR of compound **9** (CDCl<sub>3</sub>, 400 MHz).

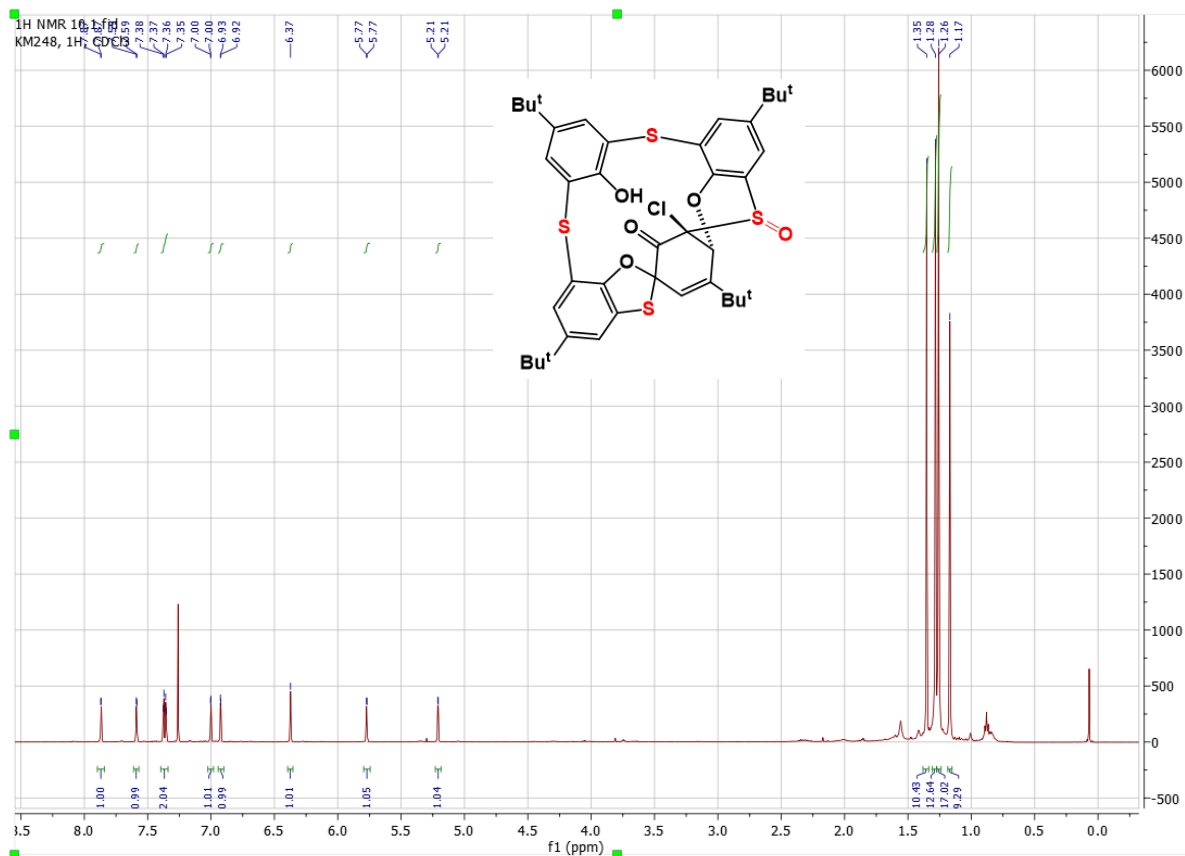

**Figure S15:** <sup>1</sup>H NMR of compound **10** (CDCl<sub>3</sub>, 400 MHz).

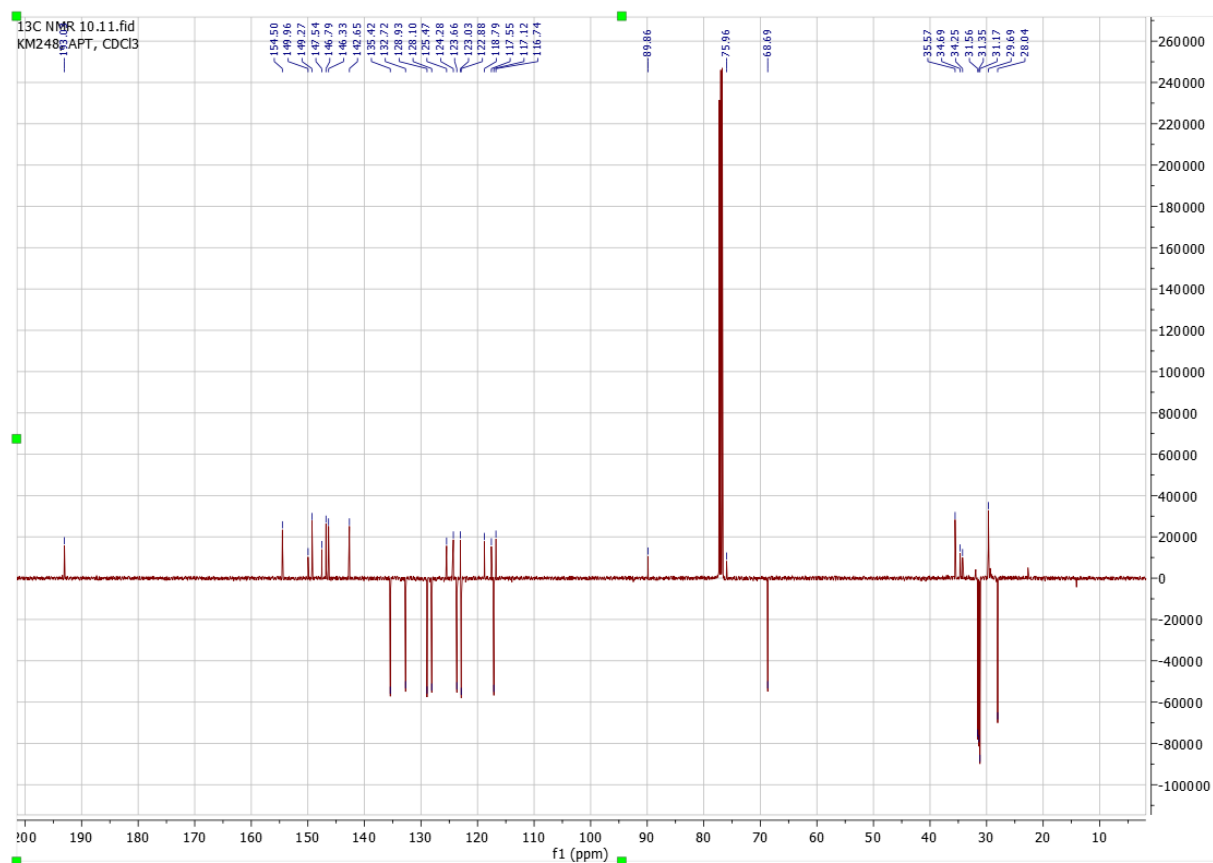

**Figure S16:** <sup>13</sup>C(APT) NMR of compound **10** (CDCl<sub>3</sub>, 100 MHz)

194\_Mamleev\_ESIpos\_KM-248\_1  
MeOH

05/03/22 11:47:12

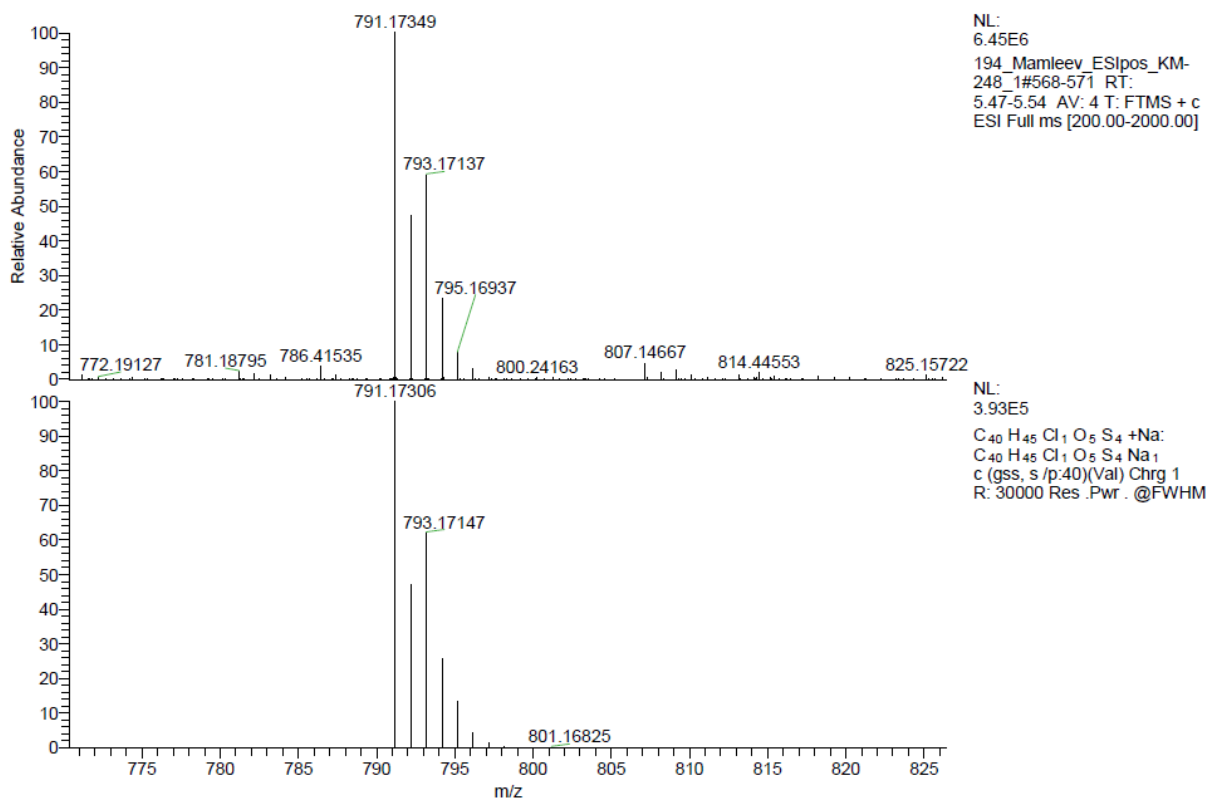

**Figure S17:** HRMS of compound **10** (ESI<sup>+</sup>).

## 2. The Variable Temperature (VT) NMR experiments

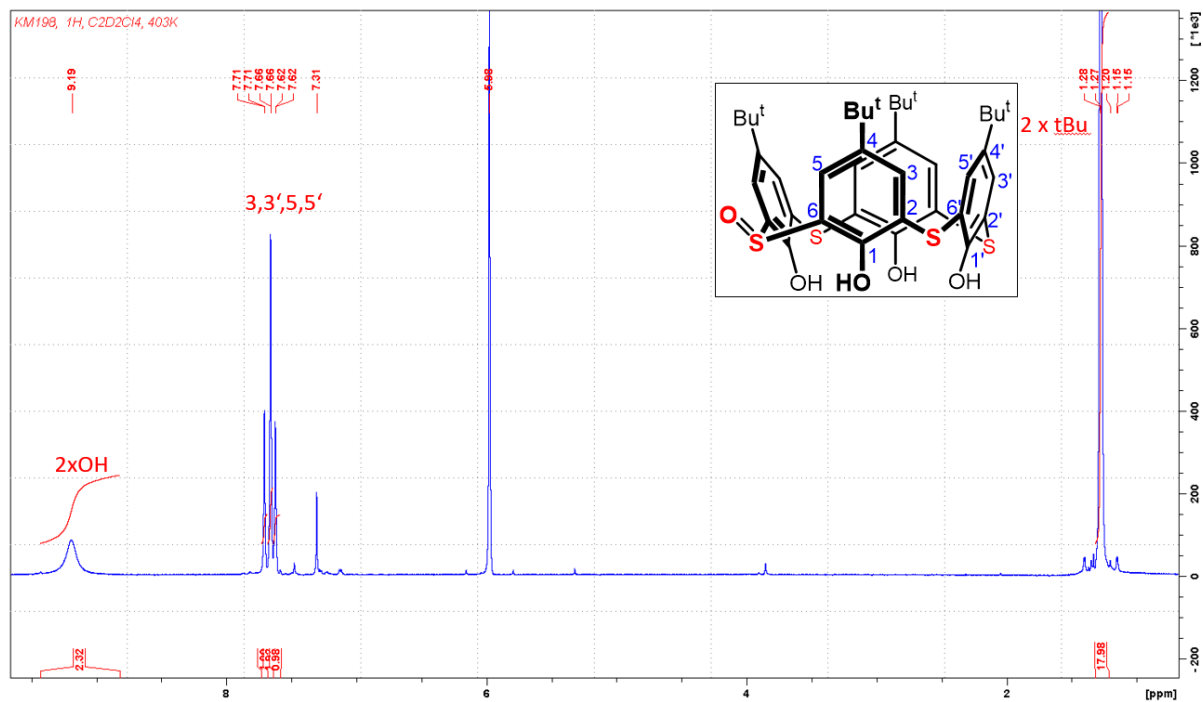

Figure S18:  $^1\text{H}$  NMR of compound 4 ( $\text{C}_2\text{D}_2\text{Cl}_4$ , 500 MHz, 403 °K)

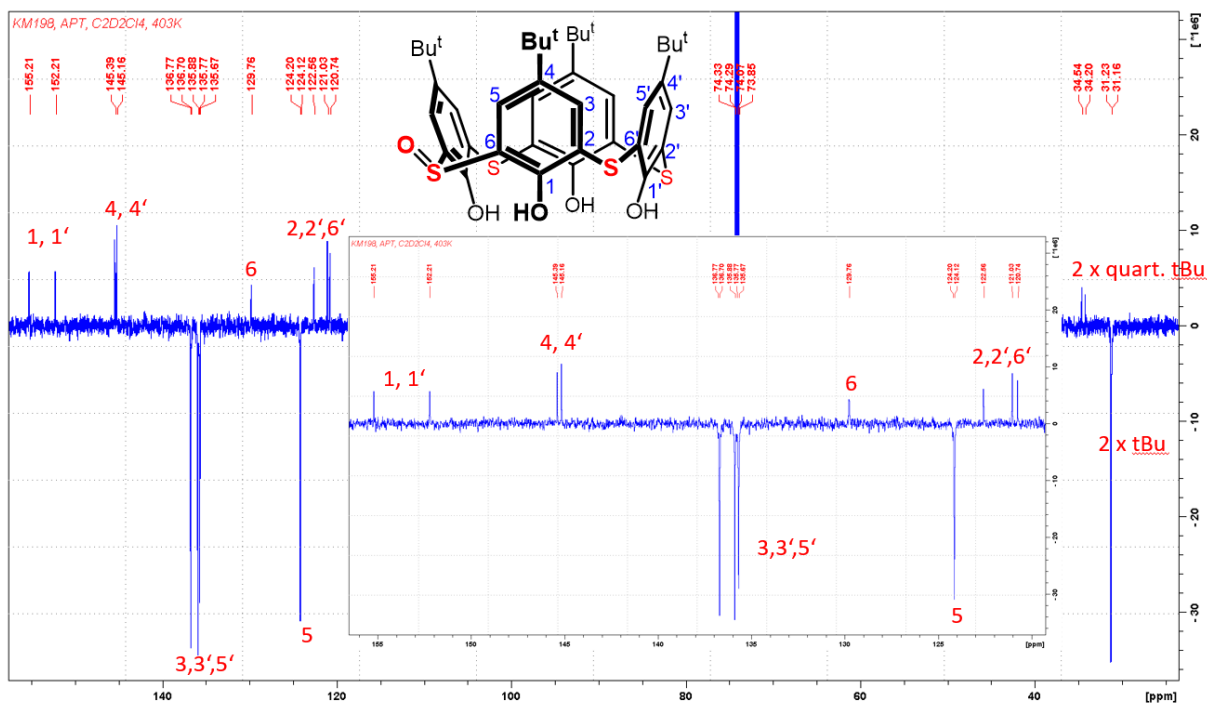

Figure S19:  $^{13}\text{C}$  NMR of compound 4 ( $\text{C}_2\text{D}_2\text{Cl}_4$ , 100 MHz, 403 °K)

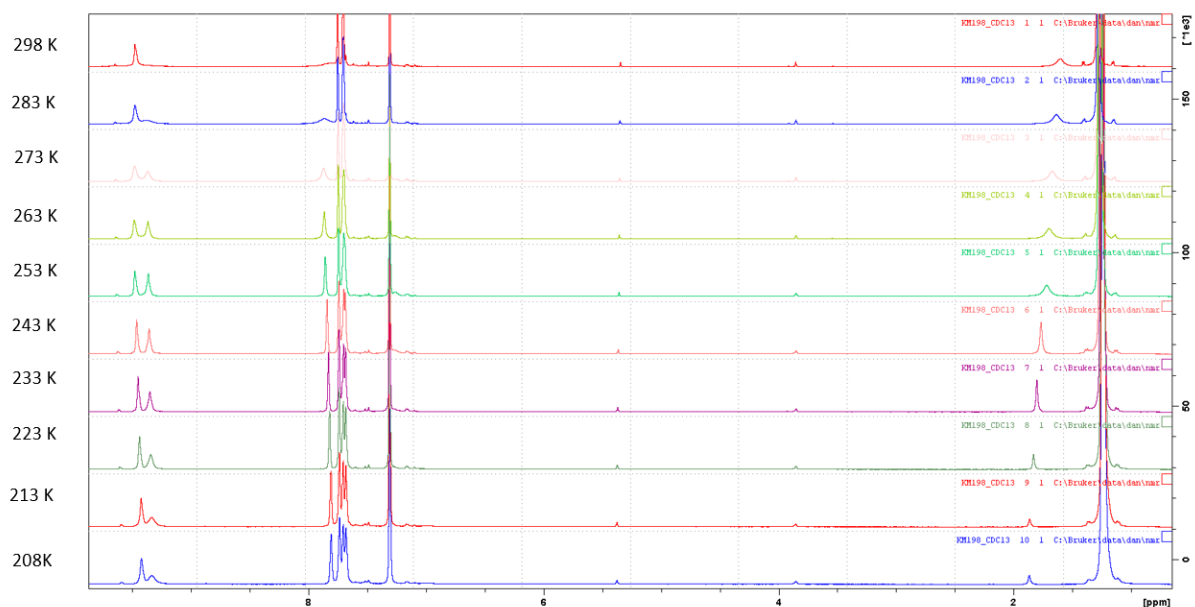

**Figure S20:**  $^1\text{H}$  NMR of compound **4** ( $\text{CDCl}_3$ , 500 MHz).

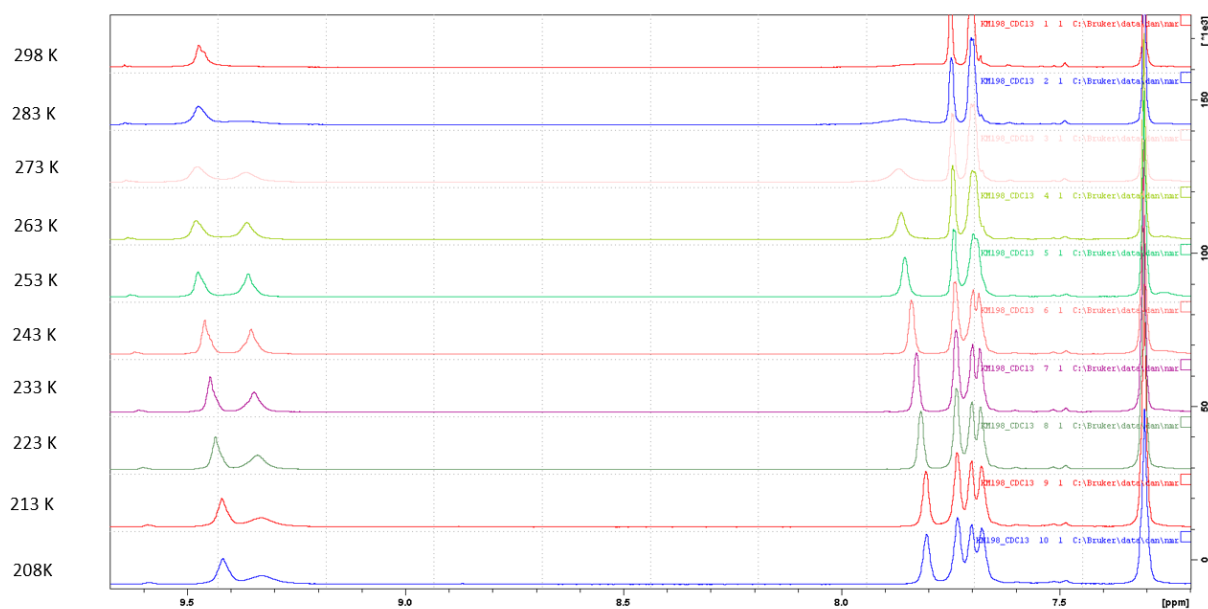

**Figure S21:**  $^1\text{H}$  NMR of compound **4** (Aromatic part) ( $\text{CDCl}_3$ , 500 MHz).

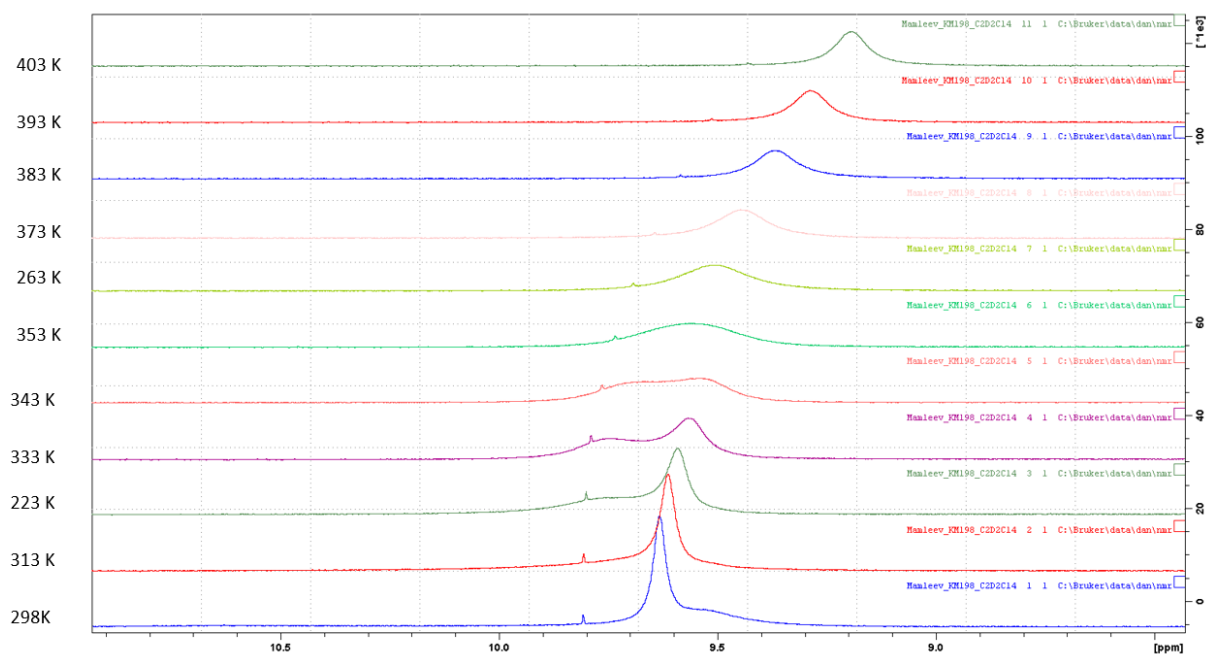

**Figure S22:**  $^1\text{H}$  NMR of compound **4** (OH- groups part) ( $\text{CDCl}_3$ , 500 MHz).

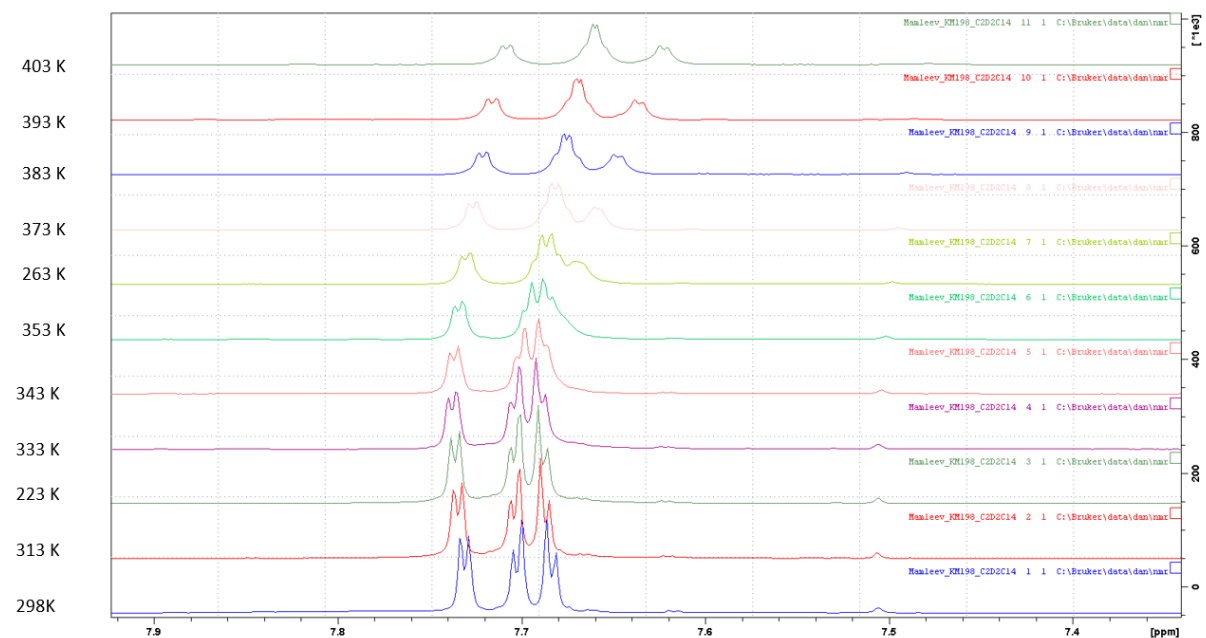

**Figure S23:**  $^1\text{H}$  NMR of compound **4** (Aromatic part) ( $\text{CDCl}_3$ , 500 MHz).

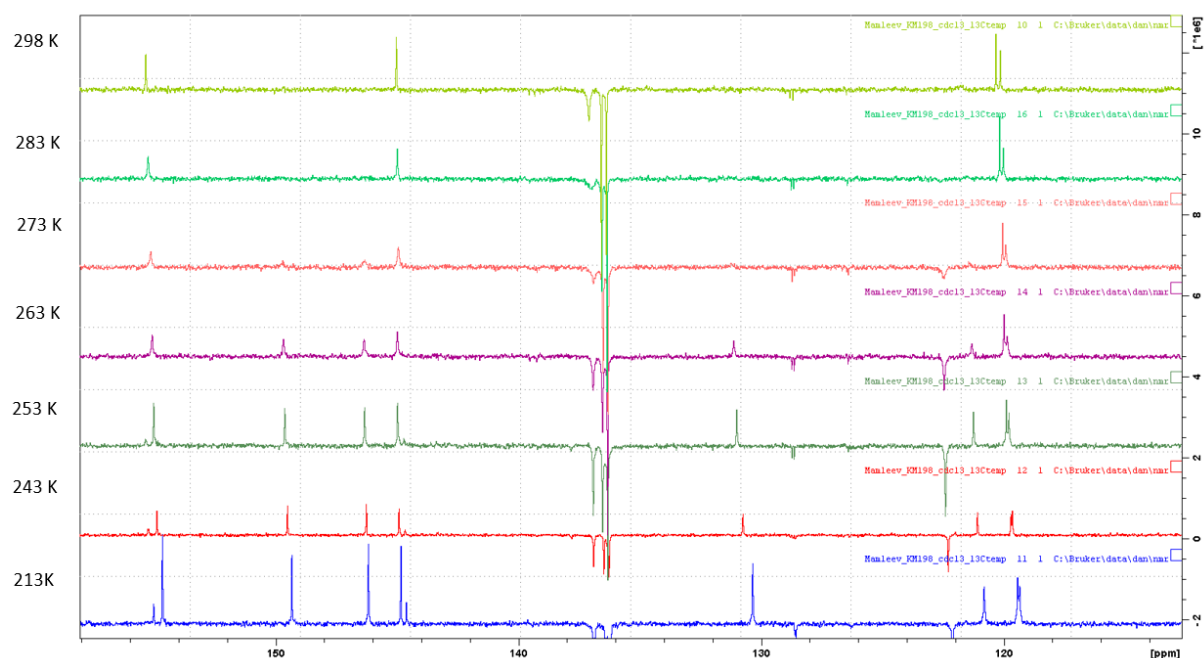

**Figure S24:**  $^{13}\text{C}$ (APT) NMR of compound **4** (Aromatic part) ( $\text{CDCl}_3$ , 100 MHz)

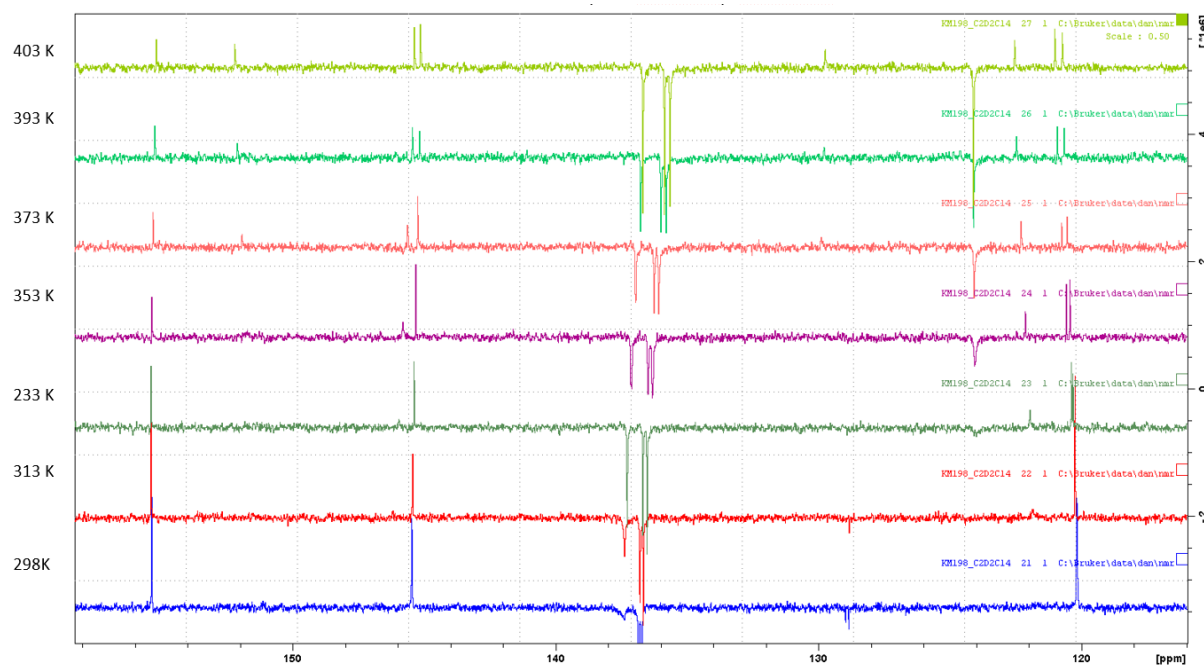

**Figure S25:**  $^{13}\text{C}$ (APT) NMR of compound **4** (Aromatic part) ( $\text{CDCl}_3$ , 100 MHz)

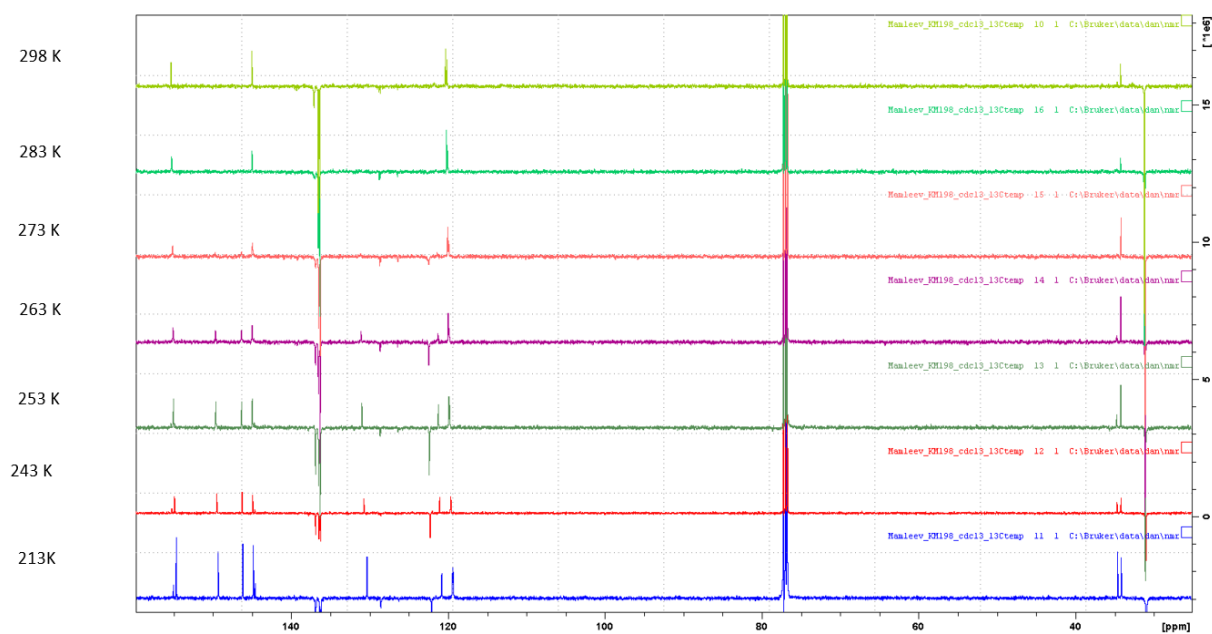

**Figure S26:**  $^{13}\text{C}$ (APT) NMR of compound **4** ( $\text{CDCl}_3$ , 100 MHz)

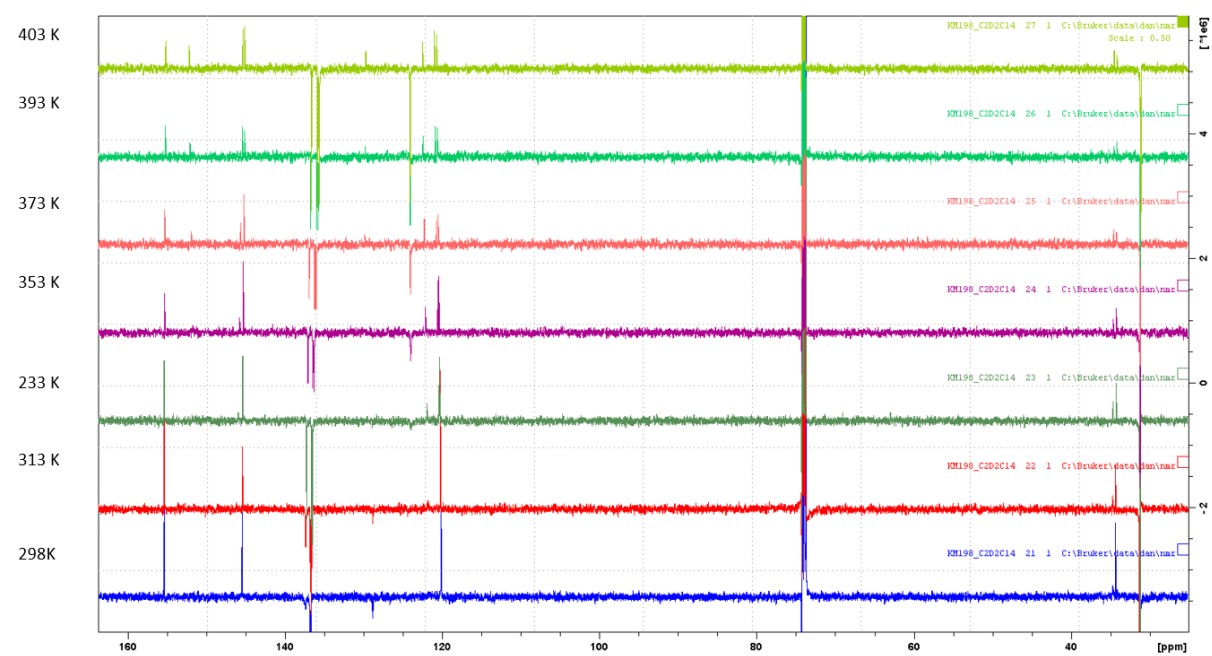

**Figure S27:**  $^{13}\text{C}$ (APT) NMR of compound **4** ( $\text{CDCl}_3$ , 100 MHz)

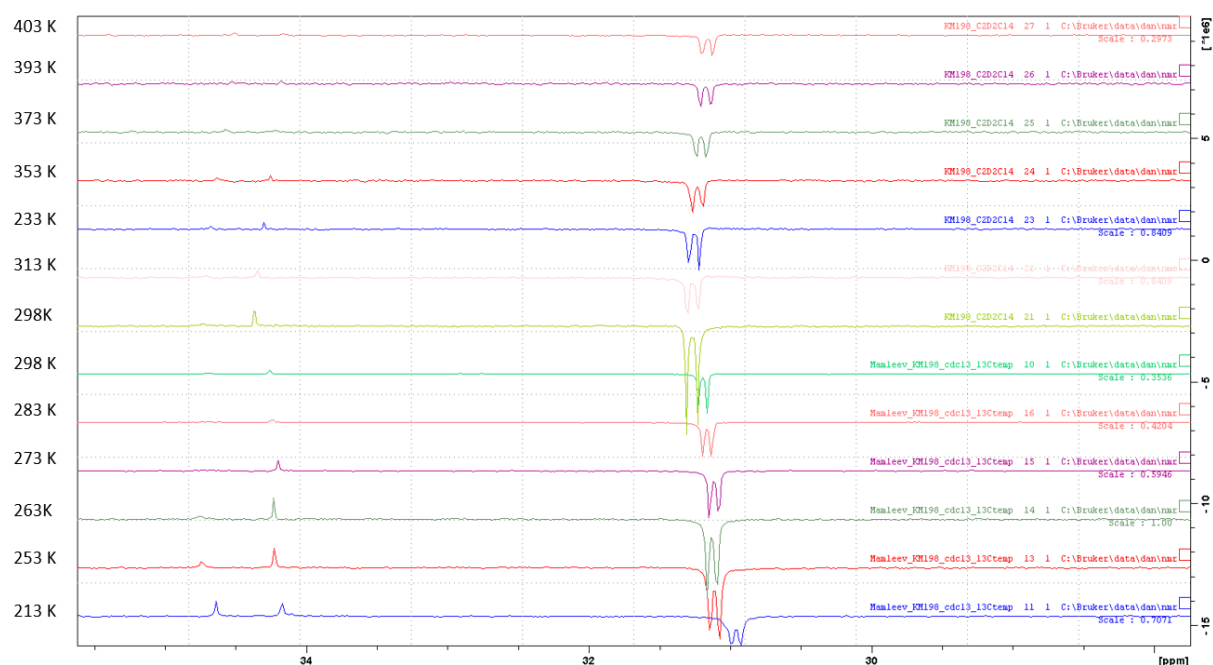

**Figure S28:**  $^{13}\text{C}$ (APT) NMR of compound **4** (*tert*-butyl part) ( $\text{CDCl}_3$ , 100 MHz)

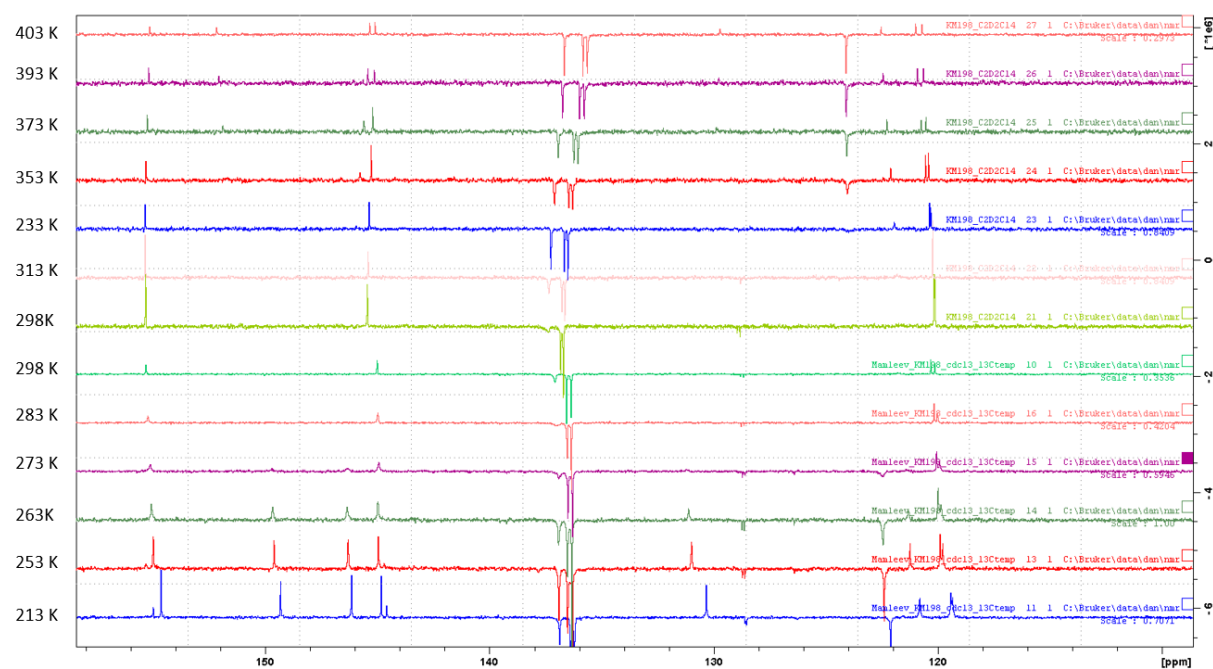

**Figure S29:**  $^{13}\text{C}$ (APT) NMR of compound **4** (Aromatic part) ( $\text{CDCl}_3$ , 100 MHz)



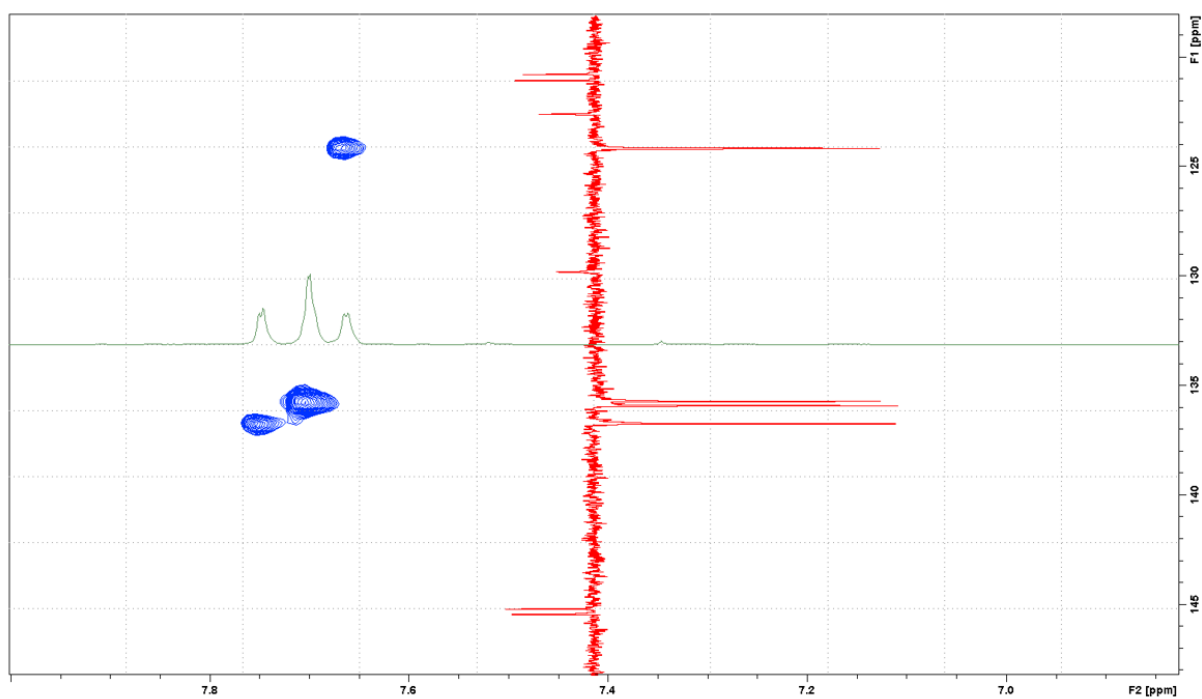

**Figure S30:** HMQC NMR of compound 4 (Aromatic part, 403 °K) (CDCl<sub>3</sub>, 100 MHz)

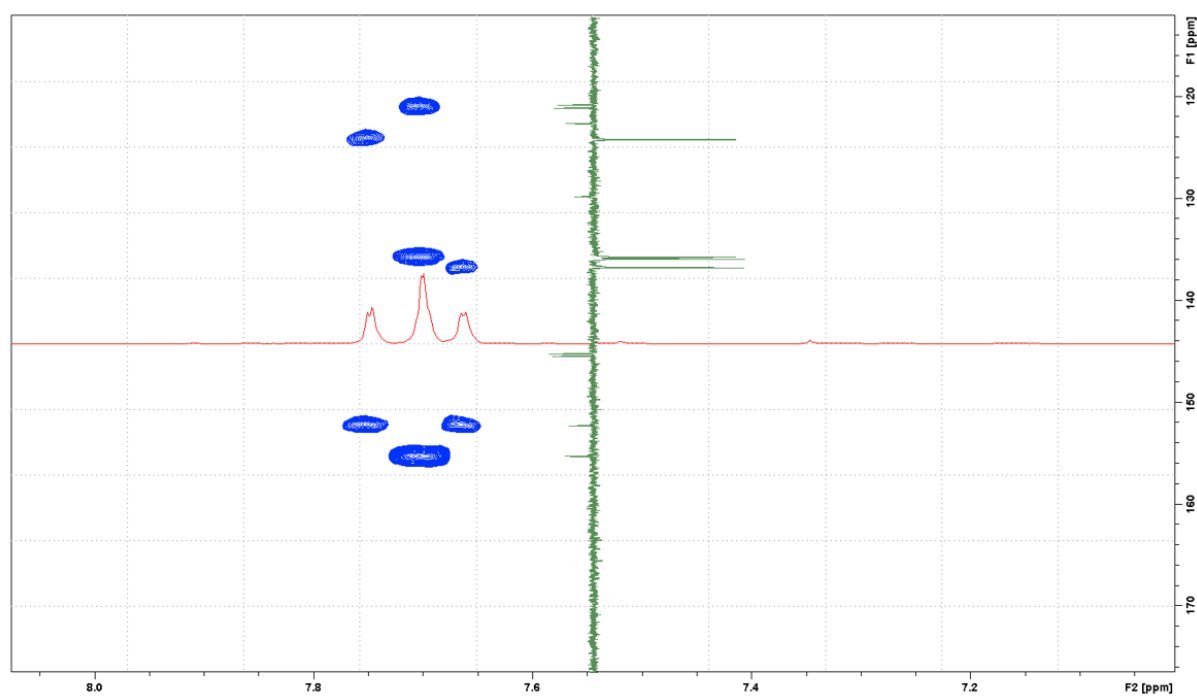

**Figure S31:** HMBC NMR of compound 4 (Aromatic part 403 °K) (CDCl<sub>3</sub>, 100 MHz)

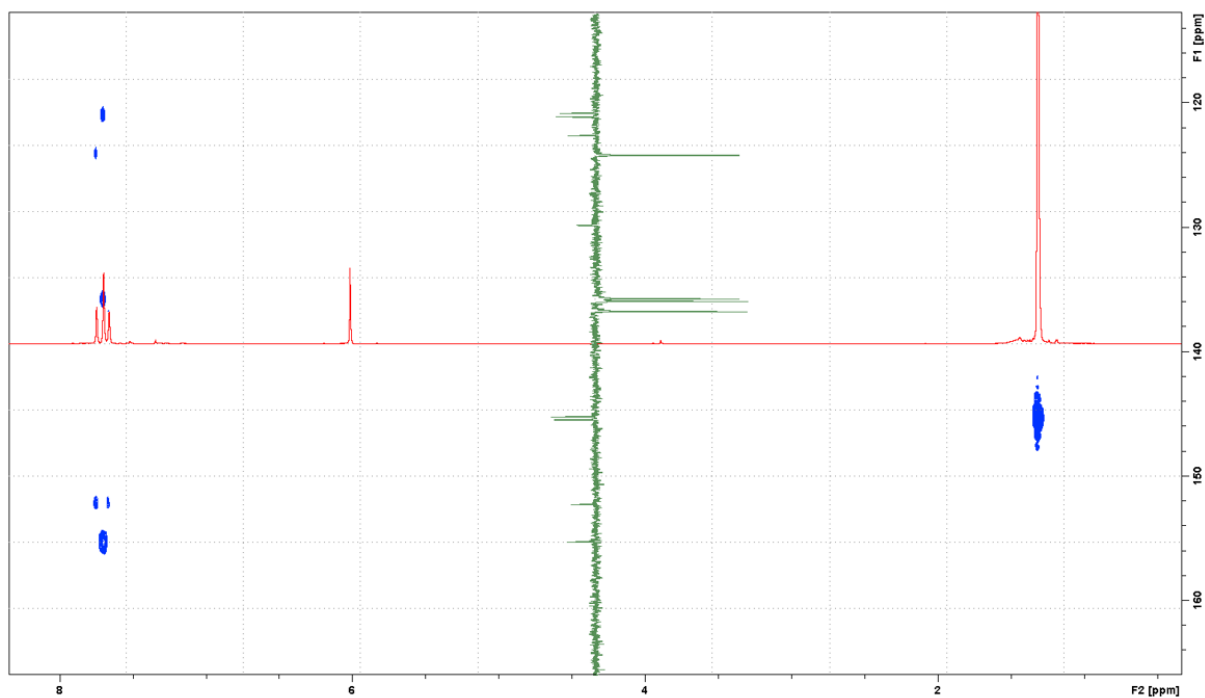

**Figure S32:** HMBC NMR of compound **4** (Aromatic and *tert*-butyl parts, 403 °K) (CDCl<sub>3</sub>, 100 MHz)

### 3. Crystallographic data

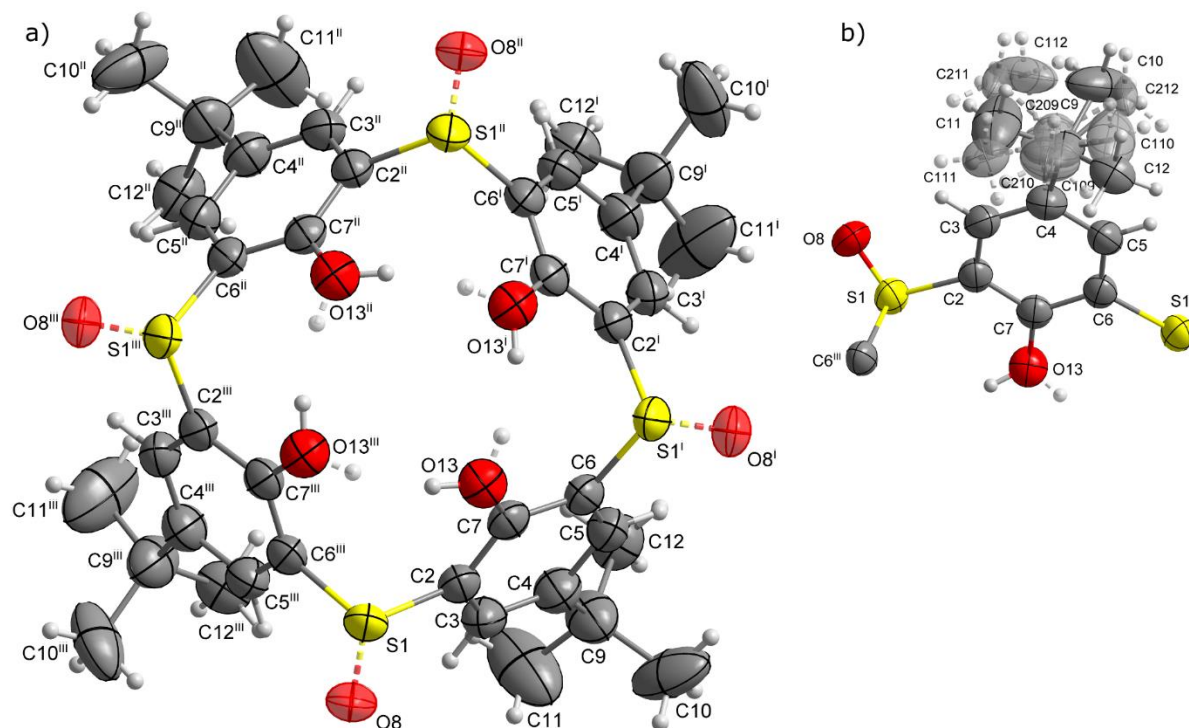

**Figure S33:** Numbering scheme of crystal structure **4**, with a) full calixarene visible, disordered tert-butyl groups omitted for clarity and b) the asymmetric unit with tert-butyl group disorder visible. Weakly occupied atoms depicted as transparent with dashed bonds. Symmetry codes: (i) 0.5-y, x, z; (ii) 0.5-x, 0.5-y, z; (iii) y, 0.5-x, z.

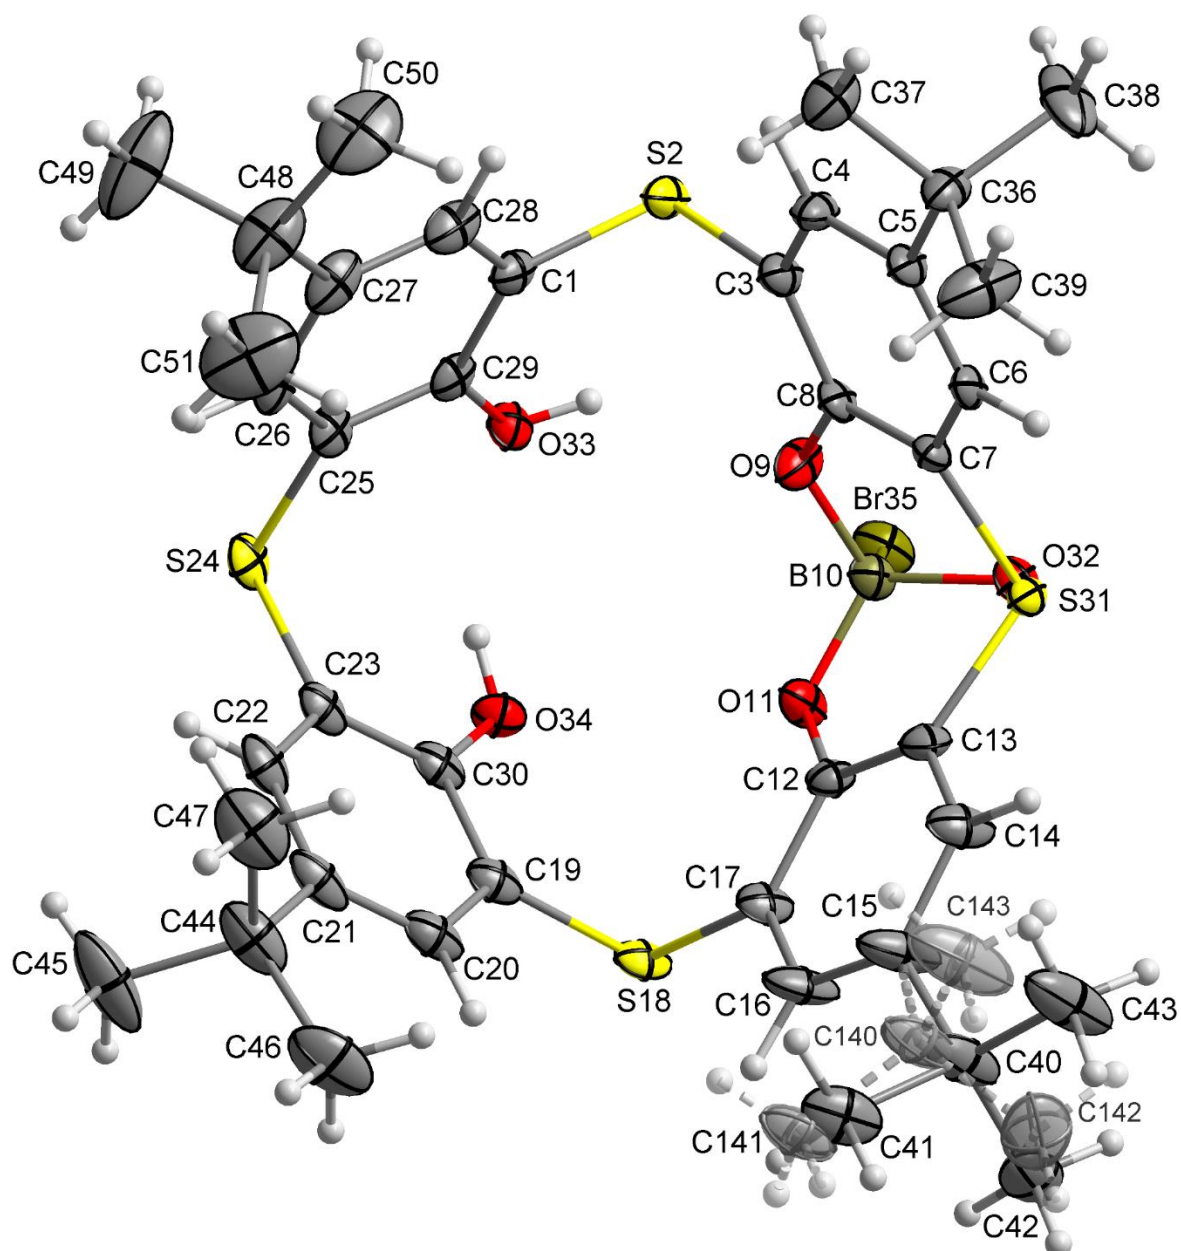

**Figure S34:** Numbering scheme of crystal structure 5. Weakly occupied atoms depicted as transparent with dashed bonds.

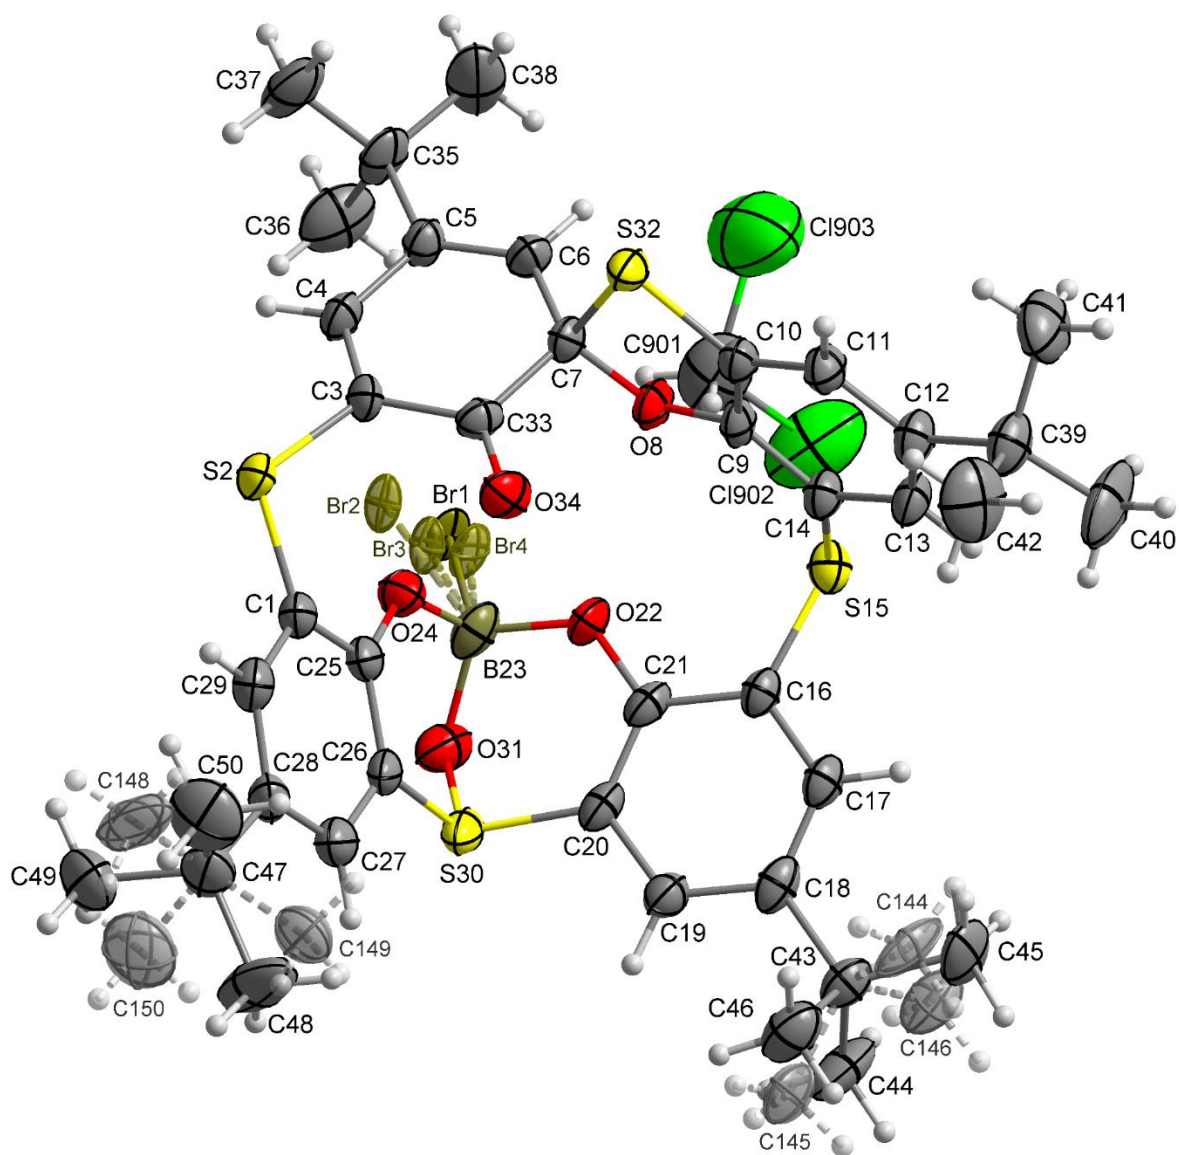

**Figure S35:** Numbering scheme of crystal structure **6**. Weakly occupied atoms depicted as transparent with dashed bonds.

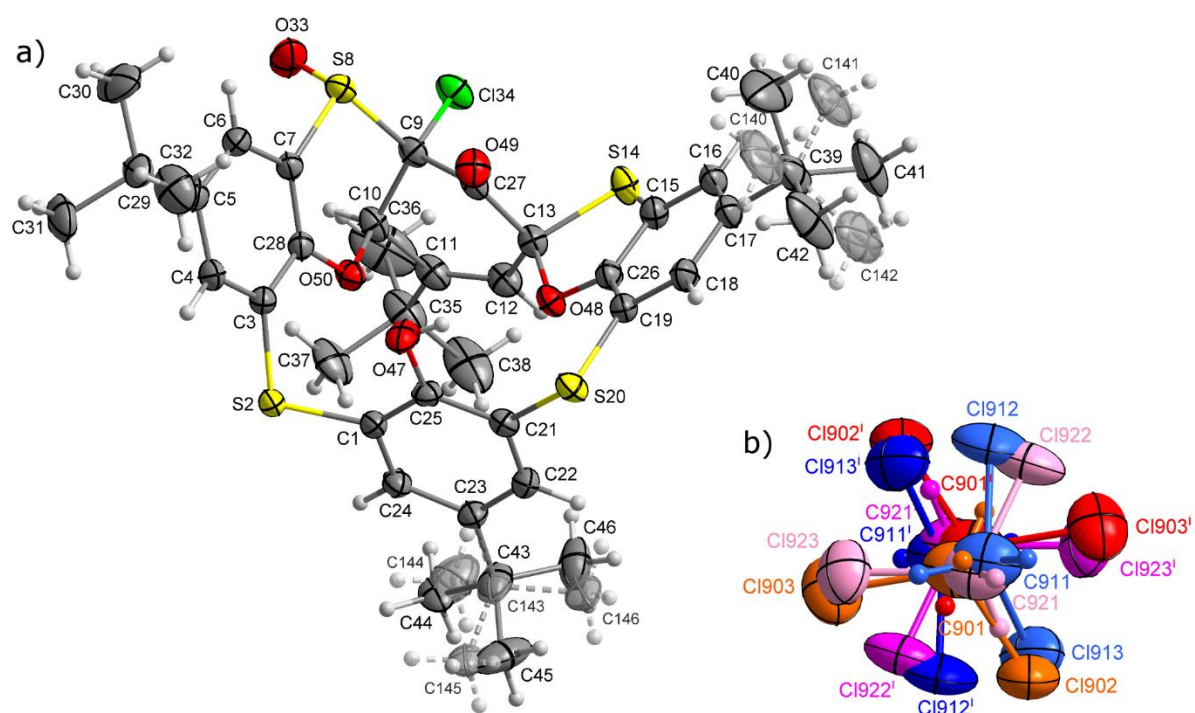

**Figure S36:** Numbering scheme of crystal structure **10** with a) disordered solvent omitted b) solvent disorder with color-coding. Weakly occupied atoms depicted as transparent with dashed bonds. Symmetry code: (i)  $-x, 2-y, -z$ .
